# Supplementary material for: Genetic Diversity, Pathogenicity and Host Resistance of Fusarium Species from Soybean in Canada
Source: Preprints.org preprint supplement (doi:10.20944/preprints202311.1514.v1), 2023-11-23
Supplement: Supplementary file 2 [file Supplementary Table 1.xlsx]

## Sheet: Table
Supplementary Table S1: Root rot severity, emergence, plant height, and dry shoot and root weight in response to inoculation with each of six Fusarium spp.
CV.ID	CV.name	Non-inoculated control									F. gra									F. ave									F. acu									F. oxy									F. red
		Count1	Count2	Count3	Height1	Height2	DS1	DS2	Shoot	Root	Count1	Count2	Count3	Height1	Height2	DS1	DS2	Shoot	Root	Count1	Count2	Count3	Height1	Height2	DS1	DS2	Shoot	Root	Count1	Count2	Count3	Height1	Height2	DS1	DS2	Shoot	Root	Count1	Count2	Count3	Height1	Height2	DS1	DS2	Shoot	Root	Count1	Count2	Count3
1	HS11Ry07	7 a	7 a	7 a	16.1 ab	16.1 ab	0	0	1.4 b	0.3 abcdef	5.6 abc	5.3 abcde	5.1 abcd	8.1 cde	6 bcdef	2.5 bcde	2.9 abc	1 cdef	0.3 cd	1.4 abcde	1.8 abcde	1.3 abcd	4.6 abcd	1.5 abcd	2.5 abc	3.5 abc	0.2 bcde	0 bcde	3.8 abcd	4.0 abc	3.6 abc	8.3 a	4.8 ab	2.1 c	3 bc	0.7 abcd	0.2 abc	1.5 bcde	1.8 abcdef	1.4 abcdef	6 abcde	0.2 abcd	2.5 bcd	3.6 ab	0.2 cdef	0 bcdef	5.3 abc	5.5 abc	5 abcd
2	S15B4	6.8 abc	6.8 ab	6.6 abcd	15.6 ab	15.2 abc	0	0	1.2 cd	0.3 cdefgh	4.9 bcdef	4.8 cdefg	4.3 cdef	8.7 cde	5.9 bcdefg	2.1 cdefg	2.7 bcde	0.9 cdefg	0.3 cd	1.5 abcde	1.6 abcdef	1.5 abcd	4.4 abcd	1.3 abcd	2.7 abc	3.5 abcd	0.3 abcde	0.1 abcd	4.3 abc	4.1 ab	3.8 abc	7.9 ab	4.6 abc	2 c	2.9 bc	0.7 abc	0.2 a	1.4 bcde	1.4 cdefg	0.9 cdefg	7.9 ab	0.2 abcd	2.6 bcd	3.6 ab	0.2 def	0 bcdef	5.4 ab	5.8 a	5.6 ab
3	P15T46R2	6.4 abcd	6.4 abc	6.3 bcd	15.1 abc	13.7 cd	0	0	1.1 de	0.3 ghi	5.3 abcde	5.6 abcd	5.3 abc	9.7 abc	7.9 ab	1.7 g	2 f	1.1 cd	0.3 cd	0.4 e	0.6 f	0.4 d	2.8 cd	0.4 d	3.3 ab	3.7 ab	0.1 de	0 de	4.1 abcd	3.8 abcd	3.5 abc	6.2 abcdef	3.8 abcde	2.3 bc	2.9 bc	0.4 bcdef	0.1 cdef	2.3 ab	2.3 abc	1.9 abc	8.1 a	0.3 ab	2.3 bcd	3.1 de	0.4 abc	0.1 ab	5.6 ab	5.6 ab	5.1 abcd
4	B150Y1	6.9 ab	6.9 a	6.9 ab	16.5 ab	16.3 ab	0	0	1.5 ab	0.4 ab	6 ab	6 ab	5.9 a	11 ab	9.5 a	1.7 fg	2 f	1.4 ab	0.4 a	1.3 bcde	1.3 cdef	1.3 abcd	5.3 abcd	1.8 abc	2.8 abc	3.5 abcd	0.4 ab	0.1 abcd	3.3 abcde	3.3 abcdef	2.9 cdef	5 cdefgh	4.4 abcd	2.4 bc	2.9 bc	0.8 ab	0.2 a	2.6 a	2.9 a	2.3 a	7 abc	0.3 a	2.2 cd	3.2 bcde	0.6 a	0.1 a	6.1 a	5.8 a	5.6 ab
5	Williams	7 a	7 a	7 a	15.2 abc	15.2 abc	0	0	1.4 bc	0.4 abcd	5.1 abcdef	5.1 abcdef	4.9 abcde	8.5 cde	6.4 bcde	2.7 bc	3 ab	1.1 cd	0.3 cd	1.1 cde	1.1 def	0.9 cd	3.2 cd	1 bcd	3.1 ab	3.8 a	0.2 bcde	0 bcde	3.3 abcde	3.0 bcdef	2.8 cdef	3.6 ghi	3.1 abcdef	2.8 abc	3.2 bc	0.6 abcd	0.2 abcd	2.6 a	2.6 ab	2 ab	7.4 abc	0.3 ab	2.5 bcd	3.5 abc	0.5 ab	0.1 abcd	5.4 ab	5 abcdef	5 abcd
6	Akras	6.5 abcd	6.8 ab	6.3 bcd	14.8 bcd	14.3 bc	0	0	0.9 f	0.3 hi	4.1 efgh	4.1 efgh	3.9 def	9.8 abc	5.8 cdefg	2.1 bcdefg	2.7 bcde	0.7 ghi	0.2 cde	1.1 cde	1.3 cdef	1 bcd	5.3 abcd	1.4 abcd	2.5 abc	3.4 abcd	0.2 bcde	0 bcde	2.4 cdef	2.0 def	1.8 defg	3.3 hi	2 efgh	2.9 ab	3.2 abc	0.6 abcde	0.2 abcd	0.6 ef	0.6 fg	0.6 efg	6.6 abcd	0.1 cdef	2.8 bcd	3.3 bcde	0.1 ef	0 bcdef	4.3 cde	4.1 f	4.1 def
7	TH32004R2Y	7 a	7 a	6.9 ab	13.6 cde	13.6 cd	0	0	1.2 cd	0.3 abcde	5.3 abcde	4.9 bcdefg	4.9 abcde	9.4 abcd	6.8 bcde	2.1 bcdefg	2.7 bcde	0.9 cdefg	0.3 bc	1.1 cde	1.5 bcdef	1.3 abcd	4.7 abcd	1.3 abcd	2.4 abc	3.6 abc	0.3 bcde	0.1 bcde	2.8 bcdef	3.1 abcdef	2.6 cdef	5.4 cdefgh	2.6 cdefgh	2.1 c	3.1 bc	0.5 abcde	0.2 a	1.5 bcde	1.5 bcdefg	1.6 abcde	8 ab	0.2 abc	2.4 bcd	3.4 abcde	0.4 bcd	0.1 abc	5 bcd	5.1 abcdef	6 a
8	AC Proteus	5.6 ef	5.6 d	6 de	12.3 efg	9.7 fgh	0	0	1.1 def	0.3 defghi	4.8 cdef	4.6 defgh	4.5 bcdef	9.3 bcd	6.2 bcdef	2 defg	2.7 bcde	1 cdef	0.3 cd	1.5 abcde	1.6 abcdef	1.4 abcd	4.6 abcd	1.4 abcd	2.7 abc	3.6 abc	0.3 abcde	0.1 abc	1.1 f	1.3 f	0.9 g	1.8 i	0.7 h	3.6 a	3.9 a	0.1 f	0 f	1.1 cdef	1.1 cdefg	1.1 bcdefg	4.5 abcdef	0.1 cdef	2.9 abcd	3.6 ab	0.3 bcde	0.1 abcdef	4.8 bcd	4.5 cdef	4.9 abcde
9	AAC Edward 2019	6.3 bcde	6.5 abc	6.6 abcd	12.2 efg	11.4 ef	0	0	1.2 de	0.3 defghi	5 abcdef	4.8 cdefg	4.6 abcdef	9 bcde	6 bcdef	2.2 bcdefg	2.6 bcde	0.9 cdefg	0.2 cde	1.1 cde	1.1 def	0.6 d	3.5 abcd	0.8 cd	2.9 ab	3.6 abc	0.1 cde	0 cde	2.9 bcdef	2.9 bcdef	2.6 cdef	7 abcd	2.5 defgh	2 c	3.1 bc	0.4 cdef	0.1 bcdef	1.8 abcd	2 abcd	1.6 abcde	6.1 abcde	0.2 abcde	2.6 bcd	3.2 bcde	0.2 bcde	0.1 a	5 bcd	4.9 abcdef	4.5 bcdef
10	AAC Springfield 2019	6.8 abc	6.5 abc	6.6 abcd	11.5 fgh	10.6 efg	0	0	1 def	0.3 hi	3.4 h	3.5 h	3.4 f	7.9 cdef	3.9 gh	2.2 bcdefg	2.9 abc	0.6 hi	0.1 ef	0.6 e	0.9 ef	0.6 d	2.4 d	0.3 d	3.3 ab	3.7 abc	0.1 e	0 e	3.4 abcde	3.3 abcdef	2.6 cdef	4.7 defgh	2.2 efgh	2.1 bc	3 bc	0.4 cdef	0.2 ab	0.8 def	0.8 efg	0.5 fg	2.9 def	0.1 def	3.1 abc	3.4 abcde	0.2 cdef	0 ef	4.9 bcd	4.6 bcdef	4.3 cdef
11	OAC Prudence 2019	6.6 abc	6.9 a	6.6 abcd	12.1 efg	11.9 de	0	0	1.4 b	0.4 abc	5.5 abcd	5.9 abc	5.1 abcd	8.8 cde	7.3 bcd	2 defg	2.4 cdef	1.1 bc	0.3 bc	2.5 a	2.6 a	2.4 a	6 abc	2.5 a	1.8 c	3 de	0.5 a	0.1 a	3.6 abcd	3.1 abcdef	3.4 bcd	4 fghi	2.8 bcdefgh	2.5 bc	3 bc	0.6 abcd	0.2 abc	1.9 abc	2 abcd	1.8 abcd	4.7 abcdef	0.2 abcd	2.5 bcd	3.2 bcde	0.3 bcde	0.1 abcde	4.8 bcd	5.3 abcde	4.9 abcde
12	Misty	6.9 ab	6.8 ab	6.8 abc	11.8 efg	11.4 ef	0	0	1.2 cd	0.3 cdefgh	6.1 a	6.1 a	5.5 abc	8.7 cde	7.7 abc	1.8 fg	2.2 def	1 cde	0.3 cd	2 abcd	2.4 ab	2.1 ab	3.5 bcd	1.4 abcd	2.2 bc	3.3 abcd	0.3 abc	0.1 abc	3.5 abcd	3.4 abcde	3 cde	5.7 bcdefgh	2.9 bcdefg	2.1 c	3 bc	0.6 abcd	0.2 abc	1.8 abcd	1.9 abcde	1.3 abcdefg	4.9 abcdef	0.2 abcd	2.8 bcd	3.5 abcde	0.2 cdef	0 bcdef	5.1 abc	5 abcdef	5.3 abcd
13	NSC Reston 2019	5.4 f	5.6 d	5.4 ef	11.2 fgh	8.9 gh	0	0	1.1 de	0.3 bcdefg	3.5 gh	3.9 gh	3.4 f	7.8 cdef	4.3 fgh	2.2 bcdefg	2.8 bcd	0.7 efghi	0.2 de	2.3 abc	2.3 abc	2 abc	5.7 abcd	2.3 ab	2.4 abc	3.1 cde	0.3 ab	0.1 bcde	3 bcdef	3.1 abcdef	2.9 cdef	5.5 bcdefgh	2.4 defgh	2.5 bc	3 bc	0.4 bcdef	0.1 abcde	1 cdef	1 defg	0.8 defg	4.2 abcdef	0.1 cdef	2.9 abcd	3.1 cde	0.1 def	0 ef	4.3 cde	4.3 ef	3.8 ef
14	OAC Ayton 2019	6.8 abc	6.8 ab	6.6 abcd	10.9 gh	10.6 efg	0	0	1 def	0.3 cdefgh	4.6 cdefg	4.6 defgh	4.3 cdef	7.2 ef	4.9 efgh	1.9 efg	2.5 bcdef	0.7 fghi	0.2 cde	2.4 ab	2.4 ab	2.1 ab	5.3 abcd	1.9 abc	2.3 bc	3.2 bcde	0.3 abcd	0.1 abc	3.1 abcde	3.1 abcdef	2.6 cdef	4.8 defgh	2.2 efgh	2.4 bc	3.2 abc	0.4 cdef	0.1 bcdef	0.8 def	1.1 cdefg	0.6 efg	4.2 bcdef	0.1 cdef	2.9 abcd	3.5 abcd	0.1 ef	0 cdef	4 de	4.4 def	4.3 cdef
15	Bloomfield 2019	4.5 g	4.8 e	5.3 f	8.8 i	5.8 i	0	0	1 ef	0.2 i	1.8 i	1.8 i	1.1 g	4.6 gh	1.2 i	2.5 bcd	3.4 a	0.3 jk	0.1 f	0.9 de	1.1 def	0.9 cd	2.1 d	0.4 d	3.4 a	3.5 abc	0.1 cde	0 bcde	2.3 def	2.1 cdef	1.6 efg	4.1 efghi	1.4 fgh	2.3 bc	3.2 abc	0.3 def	0.1 def	0.5 ef	0.5 g	0.6 efg	2.7 ef	0 ef	3.3 ab	3.2 bcde	0.1 ef	0 bcdef	3.5 ef	4.1 f	3.4 fg
16	AC Harmony 2019	4.1 g	4.5 e	3.9 g	8.6 i	5.4 i	0	0	0.7 g	0.2 j	0.8 i	1 i	0.9 g	3.4 h	0.7 i	3.3 a	2.9 abc	0.1 k	0 f	1.3 bcde	1.4 bcdef	1.1 bcd	3.9 abcd	0.9 cd	2.5 abc	2.7 e	0.2 bcde	0.1 bcde	1.5 ef	1.5 ef	1.3 fg	3.8 fghi	0.9 gh	2.6 bc	2.8 bc	0.2 ef	0.1 ef	0.3 f	0.4 g	0.3 g	1.1 f	0 f	3.9 a	2.1 f	0 f	0 f	2.8 f	2.5 g	2.4 g
17	OAC Petrel	6.9 ab	7 a	7 a	16.3 ab	16.3 ab	0	0	1.1 def	0.3 fghi	4.4 defgh	4.6 defgh	3.6 ef	7.4 def	5.5 defgh	2.3 bcdef	3 ab	0.6 hi	0.3 cd	1.3 bcde	1.6 abcdef	1.3 abcd	5.2 abcd	1.6 abcd	2.8 abc	3.6 abc	0.2 bcde	0 bcde	3.6 abcd	3.6 abcd	3.5 abc	5.9 abcdefg	3.1 abcdef	2.6 bc	3.4 ab	0.5 abcde	0.1 abcde	0.9 cdef	0.9 defg	0.8 defg	5.5 abcde	0.1 cdef	3.1 abc	3.8 a	0.1 def	0 cdef	5.8 ab	5.9 a	5.4 abc
18	Mandor	6.9 ab	7 a	7 a	17.1 a	17.1 a	0	0	1.7 a	0.4 a	6 ab	5.9 abc	5.8 ab	11.5 a	9.6 a	1.8 fg	2.2 ef	1.5 a	0.4 ab	2 abcd	2 abcd	2.1 ab	7.1 a	2 abc	2.3 bc	3.5 abcd	0.3 abc	0.1 ab	5 a	5.0 a	5.1 a	7.3 abc	5 a	2.1 c	2.6 c	0.9 a	0.2 a	1 cdef	1.3 cdefg	0.8 defg	4.2 bcdef	0.1 cdef	3.3 ab	3.8 a	0.1 ef	0 cdef	5 bcd	5.4 abcd	4.9 abcde
19	OT15-02	5.9 def	6 cd	6.1 cd	13 def	11.2 ef	0	0	1 def	0.3 cdefgh	4.8 cdef	5 abcdefg	4.5 bcdef	8 cdef	5.7 cdefg	2 defg	2.5 bcdef	0.8 defgh	0.3 cd	1.3 bcde	1.4 bcdef	1.3 abcd	6.9 ab	1.5 abcd	2.3 bc	3.3 abcd	0.2 bcde	0.1 ab	4.5 ab	4.6 ab	4.8 ab	6.5 abcde	4.1 abcde	2.4 bc	2.7 c	0.6 abcd	0.2 ab	1.1 cdef	1.1 cdefg	0.9 cdefg	3.9 cdef	0.1 cdef	3 abcd	3.2 bcde	0.2 def	0 def	4 de	4.1 f	4.1 def
20	Dauphin	6.1 cde	6.1 bcd	6.1 cd	9.6 hi	8.4 h	0	0	0.9 fg	0.3 efghi	4 fgh	4 fgh	3.9 def	6 fg	3.6 h	2.7 b	3 ab	0.5 ij	0.1 ef	1.4 abcde	1.5 bcdef	1.5 abcd	5.3 abcd	1.5 abcd	2.8 abc	3.4 abcd	0.2 bcde	0 bcde	3.1 abcde	3.1 abcdef	3.3 bcde	7.1 abcd	3.1 abcdef	2.2 bc	2.9 bc	0.5 bcdef	0.1 abcdef	1.5 bcde	1.5 bcdefg	1.6 abcde	5.6 abcde	0.2 bcdef	2 d	3 e	0.2 cdef	0 bcdef	5.3 abc	5.3 abcde	5.4 abc
	LSD	0.7	0.7	0.7	1.9	2	NA	NA	0.2	0.07	1.2	1.2	1.3	2.1	2.1	0.6	0.6	0.3	0.11	1.2	1.1	1.2	3.6	1.3	1.1	0.5	0.2	0.06	1.9	1.9	1.7	2.5	2.1	0.8	0.7	0.4	0.1	1.1	1.1	1.1	3.9	0.1	1	0.5	0.2	0.07	1.1	1.1	1.1
[truncated: 15 more columns]
