# Supplementary material for: Genetic Diversity, Pathogenicity and Host Resistance of Fusarium Species from Soybean in Canada
Source: Preprints.org preprint supplement (doi:10.20944/preprints202311.1514.v1), 2023-11-23
Supplement: Supplementary file 3 [file Supplementary Table 2 .xlsx]

## Sheet: BLAST result
Supplementary Table S2: Full list of fungal isolates and associated details.
ID	Isolate	Group	Subgroup	Province	Morphology discription	ITS4/5-based BLAST				T12-based BLAST
						Greatest identity %	Accession	Species	Description	Greatest identity %	Accession	Species	Description
1	NSRR22_001_red1_MB	red	red1	MB	red on top; short and dense mycelium; dark red on back; mycelium not cover the plate	99.62	MT566456	Fusarium acuminatum	Fusarium acuminatum isolate N-51-1 small subunit ribosomal RNA gene, partial sequence; internal transcribed spacer 1, 5.8S ribosomal RNA gene, and internal transcribed spacer 2, complete sequence; and large subunit ribosomal RNA gene, partial sequence	94.17	MF687261	Fusarium acuminatum	Fusarium acuminatum strain W490 beta-tubulin (TUB) gene, partial cds
3	NSRR22_003_red1_MB	red	red1	MB	red on top; short and dense mycelium; dark red on back; mycelium not cover the plate	98.09	MT276041	Fusarium avenaceum	Fusarium avenaceum isolate EW_ITS1F_5 internal transcribed spacer 1, partial sequence; 5.8S ribosomal RNA gene and internal transcribed spacer 2, complete sequence; and large subunit ribosomal RNA gene, partial sequence >gi|1827671966|gb|MT276043.1| Fusarium avenaceum isolate EW_ITS1F_9 internal transcribed spacer 1, partial sequence; 5.8S ribosomal RNA gene and internal transcribed spacer 2, com…	97.39	KY055836	Fusarium avenaceum	Fusarium avenaceum isolate K2616 beta-tubulin (TUB2) gene, partial cds
4	NSRR22_004_red1_MB	red	red1	MB	red on top; short and dense mycelium; dark red on back; mycelium not cover the plate	97.43	OQ918015	Fusarium acuminatum	Fusarium acuminatum strain 18-15 internal transcribed spacer 1, partial sequence; 5.8S ribosomal RNA gene and internal transcribed spacer 2, complete sequence; and large subunit ribosomal RNA gene, partial sequence	97	MW533998	Fusarium acuminatum	Fusarium acuminatum strain LC13799 beta-tubulin gene, partial cds
5	NSRR22_005_red1_MB	red	red1	MB	red on top; short and dense mycelium; dark red on back; mycelium not cover the plate	99.62	MT566456	Fusarium acuminatum	Fusarium acuminatum isolate N-51-1 small subunit ribosomal RNA gene, partial sequence; internal transcribed spacer 1, 5.8S ribosomal RNA gene, and internal transcribed spacer 2, complete sequence; and large subunit ribosomal RNA gene, partial sequence	100	KP325410	Fusarium acuminatum	Fusarium acuminatum strain M7 beta-tubulin (TUB2) gene, partial cds
6	NSRR22_006_red1_MB	red	red1	MB	red on top; short and dense mycelium; dark red on back; mycelium not cover the plate	98.4	CP109666	Fusarium avenaceum	Fusarium avenaceum strain WV21P1A chromosome 5	100	MW533990	Fusarium acuminatum	Fusarium acuminatum strain LC13791 beta-tubulin gene, partial cds >gi|2200966638|gb|MW534000.1| Fusarium acuminatum strain LC5227 beta-tubulin gene, partial cds
7	NSRR22_007_red1_MB	red	red1	MB	red on top; short and dense mycelium; dark red on back; mycelium not cover the plate	93.64	OQ918015	Fusarium acuminatum	Fusarium acuminatum strain 18-15 internal transcribed spacer 1, partial sequence; 5.8S ribosomal RNA gene and internal transcribed spacer 2, complete sequence; and large subunit ribosomal RNA gene, partial sequence	100	FJ154744	Fusarium acuminatum	Fusarium acuminatum isolate R-7408 beta tubulin (benA) gene, partial sequence
8	NSRR22_008_red1_MB	red	red1	MB	red on top; short and dense mycelium; dark red on back; mycelium not cover the plate	99.42	OQ923671	Fusarium avenaceum	Fusarium avenaceum strain H1 small subunit ribosomal RNA gene, partial sequence; internal transcribed spacer 1, 5.8S ribosomal RNA gene, and internal transcribed spacer 2, complete sequence; and large subunit ribosomal RNA gene, partial sequence	100	FJ154744	Fusarium acuminatum	Fusarium acuminatum isolate R-7408 beta tubulin (benA) gene, partial sequence
9	NSRR22_009_red1_MB	red	red1	MB	red on top; short and dense mycelium; dark red on back; mycelium not cover the plate	96.58	OQ788314	Fusarium acuminatum	Fusarium acuminatum isolate MD1 small subunit ribosomal RNA gene, partial sequence; internal transcribed spacer 1, 5.8S ribosomal RNA gene, and internal transcribed spacer 2, complete sequence; and large subunit ribosomal RNA gene, partial sequence	100	MH341246	Fusarium acuminatum	Fusarium acuminatum strain gss152 beta-tubulin (tub2) gene, partial cds >gi|1569724537|gb|MH341247.1| Fusarium acuminatum strain gss151 beta-tubulin (tub2) gene, partial cds
10	NSRR22_010_red1_MB	red	red1	MB	red on top; short and dense mycelium; dark red on back; mycelium not cover the plate	91.68	OQ788314	Fusarium acuminatum	Fusarium acuminatum isolate MD1 small subunit ribosomal RNA gene, partial sequence; internal transcribed spacer 1, 5.8S ribosomal RNA gene, and internal transcribed spacer 2, complete sequence; and large subunit ribosomal RNA gene, partial sequence	99.81	FJ154744	Fusarium acuminatum	Fusarium acuminatum isolate R-7408 beta tubulin (benA) gene, partial sequence
11	NSRR22_011_red1_MB	red	red1	MB	red on top; short and dense mycelium; dark red on back; mycelium not cover the plate	97.95	OQ923671	Fusarium avenaceum	Fusarium avenaceum strain H1 small subunit ribosomal RNA gene, partial sequence; internal transcribed spacer 1, 5.8S ribosomal RNA gene, and internal transcribed spacer 2, complete sequence; and large subunit ribosomal RNA gene, partial sequence	100	MH341248	Fusarium acuminatum	Fusarium acuminatum strain gss163 beta-tubulin (tub2) gene, partial cds
12	NSRR22_012_red1_MB	red	red1	MB	red on top; short and dense mycelium; dark red on back; mycelium not cover the plate	98.17	OQ918015	Fusarium acuminatum	Fusarium acuminatum strain 18-15 internal transcribed spacer 1, partial sequence; 5.8S ribosomal RNA gene and internal transcribed spacer 2, complete sequence; and large subunit ribosomal RNA gene, partial sequence	100	MW533990	Fusarium acuminatum	Fusarium acuminatum strain LC13791 beta-tubulin gene, partial cds >gi|2200966638|gb|MW534000.1| Fusarium acuminatum strain LC5227 beta-tubulin gene, partial cds
13	NSRR22_013_red1_MB	red	red1	MB	red on top; short and dense mycelium; dark red on back; mycelium not cover the plate	90.43	OQ918015	Fusarium acuminatum	Fusarium acuminatum strain 18-15 internal transcribed spacer 1, partial sequence; 5.8S ribosomal RNA gene and internal transcribed spacer 2, complete sequence; and large subunit ribosomal RNA gene, partial sequence	100	MW533990	Fusarium acuminatum	Fusarium acuminatum strain LC13791 beta-tubulin gene, partial cds >gi|2200966638|gb|MW534000.1| Fusarium acuminatum strain LC5227 beta-tubulin gene, partial cds
14	NSRR22_014_red1_MB	red	red1	MB	red on top; short and dense mycelium; dark red on back; mycelium not cover the plate	99.71	OQ923671	Fusarium avenaceum	Fusarium avenaceum strain H1 small subunit ribosomal RNA gene, partial sequence; internal transcribed spacer 1, 5.8S ribosomal RNA gene, and internal transcribed spacer 2, complete sequence; and large subunit ribosomal RNA gene, partial sequence	100	MW533998	Fusarium acuminatum	Fusarium acuminatum strain LC13799 beta-tubulin gene, partial cds
15	NSRR22_015_red1_MB	red	red1	MB	red on top; short and dense mycelium; dark red on back; mycelium not cover the plate	95.44	OQ788314	Fusarium acuminatum	Fusarium acuminatum isolate MD1 small subunit ribosomal RNA gene, partial sequence; internal transcribed spacer 1, 5.8S ribosomal RNA gene, and internal transcribed spacer 2, complete sequence; and large subunit ribosomal RNA gene, partial sequence	100	MH341246	Fusarium acuminatum	Fusarium acuminatum strain gss152 beta-tubulin (tub2) gene, partial cds >gi|1569724537|gb|MH341247.1| Fusarium acuminatum strain gss151 beta-tubulin (tub2) gene, partial cds
16	NSRR22_016_red1_MB	red	red1	MB	red on top; short and dense mycelium; dark red on back; mycelium not cover the plate	95.44	OQ788314	Fusarium acuminatum	Fusarium acuminatum isolate MD1 small subunit ribosomal RNA gene, partial sequence; internal transcribed spacer 1, 5.8S ribosomal RNA gene, and internal transcribed spacer 2, complete sequence; and large subunit ribosomal RNA gene, partial sequence	100	MW533998	Fusarium acuminatum	Fusarium acuminatum strain LC13799 beta-tubulin gene, partial cds
17	NSRR22_017_red1_MB	red	red1	MB	red on top; short and dense mycelium; dark red on back; mycelium not cover the plate	99.7	OQ923671	Fusarium avenaceum	Fusarium avenaceum strain H1 small subunit ribosomal RNA gene, partial sequence; internal transcribed spacer 1, 5.8S ribosomal RNA gene, and internal transcribed spacer 2, complete sequence; and large subunit ribosomal RNA gene, partial sequence		not available	not available	not available
18	NSRR22_018_red1_MB	red	red1	MB	red on top; short and dense mycelium; dark red on back; mycelium not cover the plate	96.74	OQ788314	Fusarium acuminatum	Fusarium acuminatum isolate MD1 small subunit ribosomal RNA gene, partial sequence; internal transcribed spacer 1, 5.8S ribosomal RNA gene, and internal transcribed spacer 2, complete sequence; and large subunit ribosomal RNA gene, partial sequence		not available	not available	not available
19	NSRR22_019_red1_MB	red	red1	MB	red on top; short and dense mycelium; dark red on back; mycelium not cover the plate	96.23	OQ923671	Fusarium avenaceum	Fusarium avenaceum strain H1 small subunit ribosomal RNA gene, partial sequence; internal transcribed spacer 1, 5.8S ribosomal RNA gene, and internal transcribed spacer 2, complete sequence; and large subunit ribosomal RNA gene, partial sequence	100	MH341248	Fusarium acuminatum	Fusarium acuminatum strain gss163 beta-tubulin (tub2) gene, partial cds
20	NSRR22_020_red1_MB	red	red1	MB	red on top; short and dense mycelium; dark red on back; mycelium not cover the plate	98.63	OQ918015	Fusarium acuminatum	Fusarium acuminatum strain 18-15 internal transcribed spacer 1, partial sequence; 5.8S ribosomal RNA gene and internal transcribed spacer 2, complete sequence; and large subunit ribosomal RNA gene, partial sequence	100	MW533998	Fusarium acuminatum	Fusarium acuminatum strain LC13799 beta-tubulin gene, partial cds
21	NSRR22_021_red1_MB	red	red1	MB	red on top; short and dense mycelium; dark red on back; mycelium not cover the plate	99.1	OQ923671	Fusarium avenaceum	Fusarium avenaceum strain H1 small subunit ribosomal RNA gene, partial sequence; internal transcribed spacer 1, 5.8S ribosomal RNA gene, and internal transcribed spacer 2, complete sequence; and large subunit ribosomal RNA gene, partial sequence	98.59	OL904961	Fusarium acuminatum	Fusarium acuminatum isolate S1 beta-tubulin (TUB2) gene, partial cds
22	NSRR22_022_red1_MB	red	red1	MB	red on top; short and dense mycelium; dark red on back; mycelium not cover the plate	97.63	OQ923671	Fusarium avenaceum	Fusarium avenaceum strain H1 small subunit ribosomal RNA gene, partial sequence; internal transcribed spacer 1, 5.8S ribosomal RNA gene, and internal transcribed spacer 2, complete sequence; and large subunit ribosomal RNA gene, partial sequence	100	MW533990	Fusarium acuminatum	Fusarium acuminatum strain LC13791 beta-tubulin gene, partial cds >gi|2200966638|gb|MW534000.1| Fusarium acuminatum strain LC5227 beta-tubulin gene, partial cds
23	NSRR22_023_red1_MB	red	red1	MB	red on top; short and dense mycelium; dark red on back; mycelium not cover the plate	100	OQ923671	Fusarium avenaceum	Fusarium avenaceum strain H1 small subunit ribosomal RNA gene, partial sequence; internal transcribed spacer 1, 5.8S ribosomal RNA gene, and internal transcribed spacer 2, complete sequence; and large subunit ribosomal RNA gene, partial sequence	94.34	KX880333	Fusarium acuminatum	Fusarium acuminatum strain G13NX2-1-S-2 beta-tubulin (tub2) gene, partial cds
24	NSRR22_024_red1_MB	red	red1	MB	red on top; short and dense mycelium; dark red on back; mycelium not cover the plate	99.81	OQ788314	Fusarium acuminatum	Fusarium acuminatum isolate MD1 small subunit ribosomal RNA gene, partial sequence; internal transcribed spacer 1, 5.8S ribosomal RNA gene, and internal transcribed spacer 2, complete sequence; and large subunit ribosomal RNA gene, partial sequence	100	KX880332	Fusarium acuminatum	Fusarium acuminatum strain G13YJ1-62-2 beta-tubulin (tub2) gene, partial cds
25	NSRR22_025_red1_MB	red	red1	MB	red on top; short and dense mycelium; dark red on back; mycelium not cover the plate	99.81	OQ788314	Fusarium acuminatum	Fusarium acuminatum isolate MD1 small subunit ribosomal RNA gene, partial sequence; internal transcribed spacer 1, 5.8S ribosomal RNA gene, and internal transcribed spacer 2, complete sequence; and large subunit ribosomal RNA gene, partial sequence		not available	not available	not available
26	NSRR22_026_red1_MB	red	red1	MB	red on top; short and dense mycelium; dark red on back; mycelium not cover the plate	99.71	OQ923671	Fusarium avenaceum	Fusarium avenaceum strain H1 small subunit ribosomal RNA gene, partial sequence; internal transcribed spacer 1, 5.8S ribosomal RNA gene, and internal transcribed spacer 2, complete sequence; and large subunit ribosomal RNA gene, partial sequence		not available	not available	not available
27	NSRR22_027_red1_MB	red	red1	MB	red on top; short and dense mycelium; dark red on back; mycelium not cover the plate	99.42	OQ923671	Fusarium avenaceum	Fusarium avenaceum strain H1 small subunit ribosomal RNA gene, partial sequence; internal transcribed spacer 1, 5.8S ribosomal RNA gene, and internal transcribed spacer 2, complete sequence; and large subunit ribosomal RNA gene, partial sequence	100	MW533993	Fusarium acuminatum	Fusarium acuminatum strain LC13794 beta-tubulin gene, partial cds
28	NSRR22_028_red1_MB	red	red1	MB	red on top; short and dense mycelium; dark red on back; mycelium not cover the plate	100	OQ923671	Fusarium avenaceum	Fusarium avenaceum strain H1 small subunit ribosomal RNA gene, partial sequence; internal transcribed spacer 1, 5.8S ribosomal RNA gene, and internal transcribed spacer 2, complete sequence; and large subunit ribosomal RNA gene, partial sequence		not available	not available	not available
29	NSRR22_029_red1_MB	red	red1	MB	red on top; short and dense mycelium; dark red on back; mycelium not cover the plate	99.45	OQ918015	Fusarium acuminatum	Fusarium acuminatum strain 18-15 internal transcribed spacer 1, partial sequence; 5.8S ribosomal RNA gene and internal transcribed spacer 2, complete sequence; and large subunit ribosomal RNA gene, partial sequence		not available	not available	not available
30	NSRR22_030_red1_MB	red	red1	MB	red on top; short and dense mycelium; dark red on back; mycelium not cover the plate	96.97	OQ923671	Fusarium avenaceum	Fusarium avenaceum strain H1 small subunit ribosomal RNA gene, partial sequence; internal transcribed spacer 1, 5.8S ribosomal RNA gene, and internal transcribed spacer 2, complete sequence; and large subunit ribosomal RNA gene, partial sequence	100	MW533998	Fusarium acuminatum	Fusarium acuminatum strain LC13799 beta-tubulin gene, partial cds
31	NSRR22_031_red1_MB	red	red1	MB	red on top; short and dense mycelium; dark red on back; mycelium not cover the plate	99.71	OQ923671	Fusarium avenaceum	Fusarium avenaceum strain H1 small subunit ribosomal RNA gene, partial sequence; internal transcribed spacer 1, 5.8S ribosomal RNA gene, and internal transcribed spacer 2, complete sequence; and large subunit ribosomal RNA gene, partial sequence	100	MW533990	Fusarium acuminatum	Fusarium acuminatum strain LC13791 beta-tubulin gene, partial cds >gi|2200966638|gb|MW534000.1| Fusarium acuminatum strain LC5227 beta-tubulin gene, partial cds
32	NSRR22_032_red1_MB	red	red1	MB	red on top; short and dense mycelium; dark red on back; mycelium not cover the plate	95.62	OQ923671	Fusarium avenaceum	Fusarium avenaceum strain H1 small subunit ribosomal RNA gene, partial sequence; internal transcribed spacer 1, 5.8S ribosomal RNA gene, and internal transcribed spacer 2, complete sequence; and large subunit ribosomal RNA gene, partial sequence		not available	not available	not available
34	NSRR22_034_red1_MB	red	red1	MB	red on top; short and dense mycelium; dark red on back; mycelium not cover the plate	98.82	KJ529000	Fusarium avenaceum	Fusarium avenaceum strain SR-F4 18S ribosomal RNA gene, partial sequence; internal transcribed spacer 1, 5.8S ribosomal RNA gene, and internal transcribed spacer 2, complete sequence; and 28S ribosomal RNA gene, partial sequence		not available	not available	not available
35	NSRR22_035_red1_MB	red	red1	MB	red on top; short and dense mycelium; dark red on back; mycelium not cover the plate	97.31	KY555014	Fusarium acuminatum	Fusarium acuminatum isolate NIHHS427 18S ribosomal RNA gene, partial sequence; internal transcribed spacer 1, 5.8S ribosomal RNA gene, and internal transcribed spacer 2, complete sequence; and 28S ribosomal RNA gene, partial sequence	96.41	OL904961	Fusarium acuminatum	Fusarium acuminatum isolate S1 beta-tubulin (TUB2) gene, partial cds
36	NSRR22_036_red1_MB	red	red1	MB	red on top; short and dense mycelium; dark red on back; mycelium not cover the plate	96.7	OQ923671	Fusarium avenaceum	Fusarium avenaceum strain H1 small subunit ribosomal RNA gene, partial sequence; internal transcribed spacer 1, 5.8S ribosomal RNA gene, and internal transcribed spacer 2, complete sequence; and large subunit ribosomal RNA gene, partial sequence		not available	not available	not available
37	NSRR22_037_red1_MB	red	red1	MB	red on top; short and dense mycelium; dark red on back; mycelium not cover the plate	99.71	OQ923671	Fusarium avenaceum	Fusarium avenaceum strain H1 small subunit ribosomal RNA gene, partial sequence; internal transcribed spacer 1, 5.8S ribosomal RNA gene, and internal transcribed spacer 2, complete sequence; and large subunit ribosomal RNA gene, partial sequence	100	MW533990	Fusarium acuminatum	Fusarium acuminatum strain LC13791 beta-tubulin gene, partial cds >gi|2200966638|gb|MW534000.1| Fusarium acuminatum strain LC5227 beta-tubulin gene, partial cds
38	NSRR22_038_red1_MB	red	red1	MB	red on top; short and dense mycelium; dark red on back; mycelium not cover the plate	95.61	OQ923671	Fusarium avenaceum	Fusarium avenaceum strain H1 small subunit ribosomal RNA gene, partial sequence; internal transcribed spacer 1, 5.8S ribosomal RNA gene, and internal transcribed spacer 2, complete sequence; and large subunit ribosomal RNA gene, partial sequence	100	KX880332	Fusarium acuminatum	Fusarium acuminatum strain G13YJ1-62-2 beta-tubulin (tub2) gene, partial cds
39	NSRR22_039_red1_MB	red	red1	MB	red on top; short and dense mycelium; dark red on back; mycelium not cover the plate	94.93	OQ923671	Fusarium avenaceum	Fusarium avenaceum strain H1 small subunit ribosomal RNA gene, partial sequence; internal transcribed spacer 1, 5.8S ribosomal RNA gene, and internal transcribed spacer 2, complete sequence; and large subunit ribosomal RNA gene, partial sequence	100	MW533990	Fusarium acuminatum	Fusarium acuminatum strain LC13791 beta-tubulin gene, partial cds >gi|2200966638|gb|MW534000.1| Fusarium acuminatum strain LC5227 beta-tubulin gene, partial cds
40	NSRR22_040_red1_MB	red	red1	MB	red on top; short and dense mycelium; dark red on back; mycelium not cover the plate	95.81	OQ923671	Fusarium avenaceum	Fusarium avenaceum strain H1 small subunit ribosomal RNA gene, partial sequence; internal transcribed spacer 1, 5.8S ribosomal RNA gene, and internal transcribed spacer 2, complete sequence; and large subunit ribosomal RNA gene, partial sequence		not available	not available	not available
41	NSRR22_041_red1_MB	red	red1	MB	red on top; short and dense mycelium; dark red on back; mycelium not cover the plate	99.71	OQ923671	Fusarium avenaceum	Fusarium avenaceum strain H1 small subunit ribosomal RNA gene, partial sequence; internal transcribed spacer 1, 5.8S ribosomal RNA gene, and internal transcribed spacer 2, complete sequence; and large subunit ribosomal RNA gene, partial sequence	100	MH341248	Fusarium acuminatum	Fusarium acuminatum strain gss163 beta-tubulin (tub2) gene, partial cds
42	NSRR22_042_red1_SK	red	red1	SK	red on top; short and dense mycelium; dark red on back; mycelium not cover the plate	99.71	OQ923671	Fusarium avenaceum	Fusarium avenaceum strain H1 small subunit ribosomal RNA gene, partial sequence; internal transcribed spacer 1, 5.8S ribosomal RNA gene, and internal transcribed spacer 2, complete sequence; and large subunit ribosomal RNA gene, partial sequence	100	KP325410	Fusarium acuminatum	Fusarium acuminatum strain M7 beta-tubulin (TUB2) gene, partial cds
43	NSRR22_043_red1_SK	red	red1	SK	red on top; short and dense mycelium; dark red on back; mycelium not cover the plate	95.89	OQ923671	Fusarium avenaceum	Fusarium avenaceum strain H1 small subunit ribosomal RNA gene, partial sequence; internal transcribed spacer 1, 5.8S ribosomal RNA gene, and internal transcribed spacer 2, complete sequence; and large subunit ribosomal RNA gene, partial sequence	100	KP325410	Fusarium acuminatum	Fusarium acuminatum strain M7 beta-tubulin (TUB2) gene, partial cds
44	NSRR22_044_red1_SK	red	red1	SK	red on top; short and dense mycelium; dark red on back; mycelium not cover the plate	99.33	OQ923671	Fusarium avenaceum	Fusarium avenaceum strain H1 small subunit ribosomal RNA gene, partial sequence; internal transcribed spacer 1, 5.8S ribosomal RNA gene, and internal transcribed spacer 2, complete sequence; and large subunit ribosomal RNA gene, partial sequence	83.75	EU490254	Fusarium avenaceum	Fusarium avenaceum isolate ICMP11864 beta-tubulin gene, partial cds
45	NSRR22_045_red1_SK	red	red1	SK	red on top; short and dense mycelium; dark red on back; mycelium not cover the plate	87.76	OQ923671	Fusarium avenaceum	Fusarium avenaceum strain H1 small subunit ribosomal RNA gene, partial sequence; internal transcribed spacer 1, 5.8S ribosomal RNA gene, and internal transcribed spacer 2, complete sequence; and large subunit ribosomal RNA gene, partial sequence		not available	not available	not available
46	NSRR22_046_red1_SK	red	red1	SK	red on top; short and dense mycelium; dark red on back; mycelium not cover the plate	94.12	JX331657	Uncultured fungus	Uncultured fungus clone 107A65519 18S ribosomal RNA gene, partial sequence; internal transcribed spacer 1, complete sequence; and 5.8S ribosomal RNA gene, partial sequence	99.2	OL904961	Fusarium acuminatum	Fusarium acuminatum isolate S1 beta-tubulin (TUB2) gene, partial cds
47	NSRR22_047_red1_SK	red	red1	SK	red on top; short and dense mycelium; dark red on back; mycelium not cover the plate	90.82	KJ562364	Fusarium compactum	Fusarium compactum isolate Fcom4 18S ribosomal RNA gene, partial sequence; internal transcribed spacer 1, complete sequence; and 5.8S ribosomal RNA gene, partial sequence		not available	not available	not available
48	NSRR22_048_red1_SK	red	red1	SK	red on top; short and dense mycelium; dark red on back; mycelium not cover the plate	94.44	OQ923671	Fusarium avenaceum	Fusarium avenaceum strain H1 small subunit ribosomal RNA gene, partial sequence; internal transcribed spacer 1, 5.8S ribosomal RNA gene, and internal transcribed spacer 2, complete sequence; and large subunit ribosomal RNA gene, partial sequence	97.08	MF687261	Fusarium acuminatum	Fusarium acuminatum strain W490 beta-tubulin (TUB) gene, partial cds
49	NSRR22_049_red1_SK	red	red1	SK	red on top; short and dense mycelium; dark red on back; mycelium not cover the plate	93.14	OQ923671	Fusarium avenaceum	Fusarium avenaceum strain H1 small subunit ribosomal RNA gene, partial sequence; internal transcribed spacer 1, 5.8S ribosomal RNA gene, and internal transcribed spacer 2, complete sequence; and large subunit ribosomal RNA gene, partial sequence		not available	not available	not available
50	NSRR22_050_red1_SK	red	red1	SK	red on top; short and dense mycelium; dark red on back; mycelium not cover the plate	99.12	OQ923671	Fusarium avenaceum	Fusarium avenaceum strain H1 small subunit ribosomal RNA gene, partial sequence; internal transcribed spacer 1, 5.8S ribosomal RNA gene, and internal transcribed spacer 2, complete sequence; and large subunit ribosomal RNA gene, partial sequence		not available	not available	not available
51	NSRR22_051_red1_SK	red	red1	SK	red on top; short and dense mycelium; dark red on back; mycelium not cover the plate	87	OQ923671	Fusarium avenaceum	Fusarium avenaceum strain H1 small subunit ribosomal RNA gene, partial sequence; internal transcribed spacer 1, 5.8S ribosomal RNA gene, and internal transcribed spacer 2, complete sequence; and large subunit ribosomal RNA gene, partial sequence		not available	not available	not available
52	NSRR22_052_red1_SK	red	red1	SK	red on top; short and dense mycelium; dark red on back; mycelium not cover the plate	86.9	OQ923671	Fusarium avenaceum	Fusarium avenaceum strain H1 small subunit ribosomal RNA gene, partial sequence; internal transcribed spacer 1, 5.8S ribosomal RNA gene, and internal transcribed spacer 2, complete sequence; and large subunit ribosomal RNA gene, partial sequence	100	FJ154744	Fusarium acuminatum	Fusarium acuminatum isolate R-7408 beta tubulin (benA) gene, partial sequence
53	NSRR22_053_red1_SK	red	red1	SK	red on top; short and dense mycelium; dark red on back; mycelium not cover the plate	94.53	OQ923671	Fusarium avenaceum	Fusarium avenaceum strain H1 small subunit ribosomal RNA gene, partial sequence; internal transcribed spacer 1, 5.8S ribosomal RNA gene, and internal transcribed spacer 2, complete sequence; and large subunit ribosomal RNA gene, partial sequence		not available	not available	not available
54	NSRR22_054_red1_SK	red	red1	SK	red on top; short and dense mycelium; dark red on back; mycelium not cover the plate	97.64	MK594102	Fusarium acuminatum	Fusarium acuminatum isolate KSSO1_5_22 internal transcribed spacer 1, partial sequence; 5.8S ribosomal RNA gene, complete sequence; and internal transcribed spacer 2, partial sequence		not available	not available	not available
57	NSRR22_057_red1_SK	red	red1	SK	red on top; short and dense mycelium; dark red on back; mycelium not cover the plate	83.12	OQ923671	Fusarium avenaceum	Fusarium avenaceum strain H1 small subunit ribosomal RNA gene, partial sequence; internal transcribed spacer 1, 5.8S ribosomal RNA gene, and internal transcribed spacer 2, complete sequence; and large subunit ribosomal RNA gene, partial sequence		not available	not available	not available
60	NSRR22_060_red1_SK	red	red1	SK	red on top; short and dense mycelium; dark red on back; mycelium not cover the plate	93.7	OQ923671	Fusarium avenaceum	Fusarium avenaceum strain H1 small subunit ribosomal RNA gene, partial sequence; internal transcribed spacer 1, 5.8S ribosomal RNA gene, and internal transcribed spacer 2, complete sequence; and large subunit ribosomal RNA gene, partial sequence		not available	not available	not available
61	NSRR22_061_red1_SK	red	red1	SK	red on top; short and dense mycelium; dark red on back; mycelium not cover the plate	95.87	OQ923671	Fusarium avenaceum	Fusarium avenaceum strain H1 small subunit ribosomal RNA gene, partial sequence; internal transcribed spacer 1, 5.8S ribosomal RNA gene, and internal transcribed spacer 2, complete sequence; and large subunit ribosomal RNA gene, partial sequence		not available	not available	not available
62	NSRR22_062_red1_SK	red	red1	SK	red on top; short and dense mycelium; dark red on back; mycelium not cover the plate	94.12	OQ923671	Fusarium avenaceum	Fusarium avenaceum strain H1 small subunit ribosomal RNA gene, partial sequence; internal transcribed spacer 1, 5.8S ribosomal RNA gene, and internal transcribed spacer 2, complete sequence; and large subunit ribosomal RNA gene, partial sequence	97.28	MF662646	Fusarium acuminatum	Fusarium acuminatum strain W834 beta-tubulin (TUB) gene, partial cds
63	NSRR22_063_red1_SK	red	red1	SK	red on top; short and dense mycelium; dark red on back; mycelium not cover the plate	77.68	KT268914	Fusarium sp.	Fusarium sp. isolate P1641 internal transcribed spacer 1, partial sequence; 5.8S ribosomal RNA gene and internal transcribed spacer 2, complete sequence; and 28S ribosomal RNA gene, partial sequence	100	MW533998	Fusarium acuminatum	Fusarium acuminatum strain LC13799 beta-tubulin gene, partial cds
64	NSRR22_064_red1_SK	red	red1	SK	red on top; short and dense mycelium; dark red on back; mycelium not cover the plate	85.91	KJ562364	Fusarium compactum	Fusarium compactum isolate Fcom4 18S ribosomal RNA gene, partial sequence; internal transcribed spacer 1, complete sequence; and 5.8S ribosomal RNA gene, partial sequence	100	MW533990	Fusarium acuminatum	Fusarium acuminatum strain LC13791 beta-tubulin gene, partial cds >gi|2200966638|gb|MW534000.1| Fusarium acuminatum strain LC5227 beta-tubulin gene, partial cds
65	NSRR22_065_red1_SK	red	red1	SK	red on top; short and dense mycelium; dark red on back; mycelium not cover the plate	100	OQ923671	Fusarium avenaceum	Fusarium avenaceum strain H1 small subunit ribosomal RNA gene, partial sequence; internal transcribed spacer 1, 5.8S ribosomal RNA gene, and internal transcribed spacer 2, complete sequence; and large subunit ribosomal RNA gene, partial sequence	99.8	MW533998	Fusarium acuminatum	Fusarium acuminatum strain LC13799 beta-tubulin gene, partial cds
66	NSRR22_066_red1_SK	red	red1	SK	red on top; short and dense mycelium; dark red on back; mycelium not cover the plate	99.42	OQ923671	Fusarium avenaceum	Fusarium avenaceum strain H1 small subunit ribosomal RNA gene, partial sequence; internal transcribed spacer 1, 5.8S ribosomal RNA gene, and internal transcribed spacer 2, complete sequence; and large subunit ribosomal RNA gene, partial sequence	100	KX880332	Fusarium acuminatum	Fusarium acuminatum strain G13YJ1-62-2 beta-tubulin (tub2) gene, partial cds
67	NSRR22_067_red1_QC	red	red1	QC	red on top; short and dense mycelium; dark red on back; mycelium not cover the plate	99.71	OQ923671	Fusarium avenaceum	Fusarium avenaceum strain H1 small subunit ribosomal RNA gene, partial sequence; internal transcribed spacer 1, 5.8S ribosomal RNA gene, and internal transcribed spacer 2, complete sequence; and large subunit ribosomal RNA gene, partial sequence	99.22	KX880332	Fusarium acuminatum	Fusarium acuminatum strain G13YJ1-62-2 beta-tubulin (tub2) gene, partial cds
68	NSRR22_068_red1_QC	red	red1	QC	red on top; short and dense mycelium; dark red on back; mycelium not cover the plate	90.99	OQ923671	Fusarium avenaceum	Fusarium avenaceum strain H1 small subunit ribosomal RNA gene, partial sequence; internal transcribed spacer 1, 5.8S ribosomal RNA gene, and internal transcribed spacer 2, complete sequence; and large subunit ribosomal RNA gene, partial sequence	100	KP325410	Fusarium acuminatum	Fusarium acuminatum strain M7 beta-tubulin (TUB2) gene, partial cds
69	NSRR22_069_red1_QC	red	red1	QC	red on top; short and dense mycelium; dark red on back; mycelium not cover the plate	89.84	OQ923671	Fusarium avenaceum	Fusarium avenaceum strain H1 small subunit ribosomal RNA gene, partial sequence; internal transcribed spacer 1, 5.8S ribosomal RNA gene, and internal transcribed spacer 2, complete sequence; and large subunit ribosomal RNA gene, partial sequence		not available	not available	not available
70	NSRR22_070_red1_QC	red	red1	QC	red on top; short and dense mycelium; dark red on back; mycelium not cover the plate	96.42	OQ923671	Fusarium avenaceum	Fusarium avenaceum strain H1 small subunit ribosomal RNA gene, partial sequence; internal transcribed spacer 1, 5.8S ribosomal RNA gene, and internal transcribed spacer 2, complete sequence; and large subunit ribosomal RNA gene, partial sequence		not available	not available	not available
72	NSRR22_072_red1_QC	red	red1	QC	red on top; short and dense mycelium; dark red on back; mycelium not cover the plate	94.66	OQ923671	Fusarium avenaceum	Fusarium avenaceum strain H1 small subunit ribosomal RNA gene, partial sequence; internal transcribed spacer 1, 5.8S ribosomal RNA gene, and internal transcribed spacer 2, complete sequence; and large subunit ribosomal RNA gene, partial sequence		not available	not available	not available
73	NSRR22_073_red2_MB	red	red2	MB	light red on top; short and dense mycelium; white and light red on back; mycelium not cover the plate	93.94	OQ923671	Fusarium avenaceum	Fusarium avenaceum strain H1 small subunit ribosomal RNA gene, partial sequence; internal transcribed spacer 1, 5.8S ribosomal RNA gene, and internal transcribed spacer 2, complete sequence; and large subunit ribosomal RNA gene, partial sequence	100	MK185028	Fusarium avenaceum	Fusarium avenaceum isolate YNSF16-66 beta-tubulin (TUB2) gene, partial cds >gi|1780533637|gb|MK185029.1| Fusarium avenaceum isolate YNSF16-68 beta-tubulin (TUB2) gene, partial cds
74	NSRR22_074_red2_MB	red	red2	MB	light red on top; short and dense mycelium; white and light red on back; mycelium not cover the plate	98.09	OQ918015	Fusarium acuminatum	Fusarium acuminatum strain 18-15 internal transcribed spacer 1, partial sequence; 5.8S ribosomal RNA gene and internal transcribed spacer 2, complete sequence; and large subunit ribosomal RNA gene, partial sequence	100	MW533990	Fusarium acuminatum	Fusarium acuminatum strain LC13791 beta-tubulin gene, partial cds >gi|2200966638|gb|MW534000.1| Fusarium acuminatum strain LC5227 beta-tubulin gene, partial cds
75	NSRR22_075_red2_MB	red	red2	MB	light red on top; short and dense mycelium; white and light red on back; mycelium not cover the plate	98.67	MT566456	Fusarium acuminatum	Fusarium acuminatum isolate N-51-1 small subunit ribosomal RNA gene, partial sequence; internal transcribed spacer 1, 5.8S ribosomal RNA gene, and internal transcribed spacer 2, complete sequence; and large subunit ribosomal RNA gene, partial sequence	100	MW533990	Fusarium acuminatum	Fusarium acuminatum strain LC13791 beta-tubulin gene, partial cds >gi|2200966638|gb|MW534000.1| Fusarium acuminatum strain LC5227 beta-tubulin gene, partial cds
76	NSRR22_076_red2_MB	red	red2	MB	light red on top; short and dense mycelium; white and light red on back; mycelium not cover the plate	99.04	OQ788314	Fusarium acuminatum	Fusarium acuminatum isolate MD1 small subunit ribosomal RNA gene, partial sequence; internal transcribed spacer 1, 5.8S ribosomal RNA gene, and internal transcribed spacer 2, complete sequence; and large subunit ribosomal RNA gene, partial sequence		not available	not available	not available
77	NSRR22_077_red2_MB	red	red2	MB	light red on top; short and dense mycelium; white and light red on back; mycelium not cover the plate	95.62	OQ918015	Fusarium acuminatum	Fusarium acuminatum strain 18-15 internal transcribed spacer 1, partial sequence; 5.8S ribosomal RNA gene and internal transcribed spacer 2, complete sequence; and large subunit ribosomal RNA gene, partial sequence	100	KX880332	Fusarium acuminatum	Fusarium acuminatum strain G13YJ1-62-2 beta-tubulin (tub2) gene, partial cds
78	NSRR22_078_red2_MB	red	red2	MB	light red on top; short and dense mycelium; white and light red on back; mycelium not cover the plate	99.04	OQ788314	Fusarium acuminatum	Fusarium acuminatum isolate MD1 small subunit ribosomal RNA gene, partial sequence; internal transcribed spacer 1, 5.8S ribosomal RNA gene, and internal transcribed spacer 2, complete sequence; and large subunit ribosomal RNA gene, partial sequence	100	MW533990	Fusarium acuminatum	Fusarium acuminatum strain LC13791 beta-tubulin gene, partial cds >gi|2200966638|gb|MW534000.1| Fusarium acuminatum strain LC5227 beta-tubulin gene, partial cds
79	NSRR22_079_red2_MB	red	red2	MB	light red on top; short and dense mycelium; white and light red on back; mycelium not cover the plate	99.23	OQ788314	Fusarium acuminatum	Fusarium acuminatum isolate MD1 small subunit ribosomal RNA gene, partial sequence; internal transcribed spacer 1, 5.8S ribosomal RNA gene, and internal transcribed spacer 2, complete sequence; and large subunit ribosomal RNA gene, partial sequence	99.2	MW533998	Fusarium acuminatum	Fusarium acuminatum strain LC13799 beta-tubulin gene, partial cds
80	NSRR22_080_red2_MB	red	red2	MB	light red on top; short and dense mycelium; white and light red on back; mycelium not cover the plate	99.71	OQ923671	Fusarium avenaceum	Fusarium avenaceum strain H1 small subunit ribosomal RNA gene, partial sequence; internal transcribed spacer 1, 5.8S ribosomal RNA gene, and internal transcribed spacer 2, complete sequence; and large subunit ribosomal RNA gene, partial sequence		not available	not available	not available
81	NSRR22_081_red2_MB	red	red2	MB	light red on top; short and dense mycelium; white and light red on back; mycelium not cover the plate	96.77	OQ788314	Fusarium acuminatum	Fusarium acuminatum isolate MD1 small subunit ribosomal RNA gene, partial sequence; internal transcribed spacer 1, 5.8S ribosomal RNA gene, and internal transcribed spacer 2, complete sequence; and large subunit ribosomal RNA gene, partial sequence	99	MW533990	Fusarium acuminatum	Fusarium acuminatum strain LC13791 beta-tubulin gene, partial cds >gi|2200966638|gb|MW534000.1| Fusarium acuminatum strain LC5227 beta-tubulin gene, partial cds
82	NSRR22_082_red2_MB	red	red2	MB	light red on top; short and dense mycelium; white and light red on back; mycelium not cover the plate	99.71	OQ923671	Fusarium avenaceum	Fusarium avenaceum strain H1 small subunit ribosomal RNA gene, partial sequence; internal transcribed spacer 1, 5.8S ribosomal RNA gene, and internal transcribed spacer 2, complete sequence; and large subunit ribosomal RNA gene, partial sequence	99.4	FJ154742	Fusarium acuminatum	Fusarium acuminatum isolate R-6934 beta tubulin (benA) gene, partial sequence
83	NSRR22_083_red2_MB	red	red2	MB	light red on top; short and dense mycelium; white and light red on back; mycelium not cover the plate	97.91	OQ923671	Fusarium avenaceum	Fusarium avenaceum strain H1 small subunit ribosomal RNA gene, partial sequence; internal transcribed spacer 1, 5.8S ribosomal RNA gene, and internal transcribed spacer 2, complete sequence; and large subunit ribosomal RNA gene, partial sequence		not available	not available	not available
84	NSRR22_084_red2_MB	red	red2	MB	light red on top; short and dense mycelium; white and light red on back; mycelium not cover the plate	87.25	MN055985	Fusarium flocciferum	Fusarium flocciferum isolate FOEP_144.16 internal transcribed spacer 1, partial sequence; 5.8S ribosomal RNA gene and internal transcribed spacer 2, complete sequence; and large subunit ribosomal RNA gene, partial sequence		not available	not available	not available
85	NSRR22_085_red2_MB	red	red2	MB	light red on top; short and dense mycelium; white and light red on back; mycelium not cover the plate	100	OQ923671	Fusarium avenaceum	Fusarium avenaceum strain H1 small subunit ribosomal RNA gene, partial sequence; internal transcribed spacer 1, 5.8S ribosomal RNA gene, and internal transcribed spacer 2, complete sequence; and large subunit ribosomal RNA gene, partial sequence	99.81	FJ154744	Fusarium acuminatum	Fusarium acuminatum isolate R-7408 beta tubulin (benA) gene, partial sequence
86	NSRR22_086_red2_MB	red	red2	MB	light red on top; short and dense mycelium; white and light red on back; mycelium not cover the plate	99.45	OQ918015	Fusarium acuminatum	Fusarium acuminatum strain 18-15 internal transcribed spacer 1, partial sequence; 5.8S ribosomal RNA gene and internal transcribed spacer 2, complete sequence; and large subunit ribosomal RNA gene, partial sequence	99.4	MW533990	Fusarium acuminatum	Fusarium acuminatum strain LC13791 beta-tubulin gene, partial cds >gi|2200966638|gb|MW534000.1| Fusarium acuminatum strain LC5227 beta-tubulin gene, partial cds
87	NSRR22_087_red2_MB	red	red2	MB	light red on top; short and dense mycelium; white and light red on back; mycelium not cover the plate	99.05	MT566456	Fusarium acuminatum	Fusarium acuminatum isolate N-51-1 small subunit ribosomal RNA gene, partial sequence; internal transcribed spacer 1, 5.8S ribosomal RNA gene, and internal transcribed spacer 2, complete sequence; and large subunit ribosomal RNA gene, partial sequence	99.8	MW533993	Fusarium acuminatum	Fusarium acuminatum strain LC13794 beta-tubulin gene, partial cds
88	NSRR22_088_red2_MB	red	red2	MB	light red on top; short and dense mycelium; white and light red on back; mycelium not cover the plate	99.71	OQ923671	Fusarium avenaceum	Fusarium avenaceum strain H1 small subunit ribosomal RNA gene, partial sequence; internal transcribed spacer 1, 5.8S ribosomal RNA gene, and internal transcribed spacer 2, complete sequence; and large subunit ribosomal RNA gene, partial sequence	97.3	FJ154742	Fusarium acuminatum	Fusarium acuminatum isolate R-6934 beta tubulin (benA) gene, partial sequence
89	NSRR22_089_red2_MB	red	red2	MB	light red on top; short and dense mycelium; white and light red on back; mycelium not cover the plate	99.81	MT566456	Fusarium acuminatum	Fusarium acuminatum isolate N-51-1 small subunit ribosomal RNA gene, partial sequence; internal transcribed spacer 1, 5.8S ribosomal RNA gene, and internal transcribed spacer 2, complete sequence; and large subunit ribosomal RNA gene, partial sequence	99.4	MW533990	Fusarium acuminatum	Fusarium acuminatum strain LC13791 beta-tubulin gene, partial cds >gi|2200966638|gb|MW534000.1| Fusarium acuminatum strain LC5227 beta-tubulin gene, partial cds
90	NSRR22_090_red2_MB	red	red2	MB	light red on top; short and dense mycelium; white and light red on back; mycelium not cover the plate	99.42	MT601889	Fusarium reticulatum	Fusarium reticulatum isolate FJ9 internal transcribed spacer 1, partial sequence; 5.8S ribosomal RNA gene and internal transcribed spacer 2, complete sequence; and large subunit ribosomal RNA gene, partial sequence	98.69	MK185028	Fusarium avenaceum	Fusarium avenaceum isolate YNSF16-66 beta-tubulin (TUB2) gene, partial cds >gi|1780533637|gb|MK185029.1| Fusarium avenaceum isolate YNSF16-68 beta-tubulin (TUB2) gene, partial cds
91	NSRR22_091_red2_MB	red	red2	MB	light red on top; short and dense mycelium; white and light red on back; mycelium not cover the plate	99.05	MT566456	Fusarium acuminatum	Fusarium acuminatum isolate N-51-1 small subunit ribosomal RNA gene, partial sequence; internal transcribed spacer 1, 5.8S ribosomal RNA gene, and internal transcribed spacer 2, complete sequence; and large subunit ribosomal RNA gene, partial sequence	100	MH341248	Fusarium acuminatum	Fusarium acuminatum strain gss163 beta-tubulin (tub2) gene, partial cds
92	NSRR22_092_red2_MB	red	red2	MB	light red on top; short and dense mycelium; white and light red on back; mycelium not cover the plate	96.38	KT268952	Fusarium sp.	Fusarium sp. isolate P1679 internal transcribed spacer 1, partial sequence; 5.8S ribosomal RNA gene and internal transcribed spacer 2, complete sequence; and 28S ribosomal RNA gene, partial sequence		not available	not available	not available
93	NSRR22_093_red2_MB	red	red2	MB	light red on top; short and dense mycelium; white and light red on back; mycelium not cover the plate	99.73	OQ918015	Fusarium acuminatum	Fusarium acuminatum strain 18-15 internal transcribed spacer 1, partial sequence; 5.8S ribosomal RNA gene and internal transcribed spacer 2, complete sequence; and large subunit ribosomal RNA gene, partial sequence	94.62	MH341248	Fusarium acuminatum	Fusarium acuminatum strain gss163 beta-tubulin (tub2) gene, partial cds
94	NSRR22_094_red2_MB	red	red2	MB	light red on top; short and dense mycelium; white and light red on back; mycelium not cover the plate	99.71	OQ923671	Fusarium avenaceum	Fusarium avenaceum strain H1 small subunit ribosomal RNA gene, partial sequence; internal transcribed spacer 1, 5.8S ribosomal RNA gene, and internal transcribed spacer 2, complete sequence; and large subunit ribosomal RNA gene, partial sequence		not available	not available	not available
95	NSRR22_095_red2_MB	red	red2	MB	light red on top; short and dense mycelium; white and light red on back; mycelium not cover the plate	99.41	OQ923671	Fusarium avenaceum	Fusarium avenaceum strain H1 small subunit ribosomal RNA gene, partial sequence; internal transcribed spacer 1, 5.8S ribosomal RNA gene, and internal transcribed spacer 2, complete sequence; and large subunit ribosomal RNA gene, partial sequence	97.3	FJ154742	Fusarium acuminatum	Fusarium acuminatum isolate R-6934 beta tubulin (benA) gene, partial sequence
96	NSRR22_096_red2_MB	red	red2	MB	light red on top; short and dense mycelium; white and light red on back; mycelium not cover the plate	99.71	OQ923671	Fusarium avenaceum	Fusarium avenaceum strain H1 small subunit ribosomal RNA gene, partial sequence; internal transcribed spacer 1, 5.8S ribosomal RNA gene, and internal transcribed spacer 2, complete sequence; and large subunit ribosomal RNA gene, partial sequence	97.98	FJ154742	Fusarium acuminatum	Fusarium acuminatum isolate R-6934 beta tubulin (benA) gene, partial sequence
97	NSRR22_097_red2_MB	red	red2	MB	light red on top; short and dense mycelium; white and light red on back; mycelium not cover the plate	98.47	OQ788314	Fusarium acuminatum	Fusarium acuminatum isolate MD1 small subunit ribosomal RNA gene, partial sequence; internal transcribed spacer 1, 5.8S ribosomal RNA gene, and internal transcribed spacer 2, complete sequence; and large subunit ribosomal RNA gene, partial sequence		not available	not available	not available
99	NSRR22_099_red2_SK	red	red2	SK	light red on top; short and dense mycelium; white and light red on back; mycelium not cover the plate	97.7	OQ788314	Fusarium acuminatum	Fusarium acuminatum isolate MD1 small subunit ribosomal RNA gene, partial sequence; internal transcribed spacer 1, 5.8S ribosomal RNA gene, and internal transcribed spacer 2, complete sequence; and large subunit ribosomal RNA gene, partial sequence		not available	not available	not available
100	NSRR22_100_red2_SK	red	red2	SK	light red on top; short and dense mycelium; white and light red on back; mycelium not cover the plate	99.81	OQ788314	Fusarium acuminatum	Fusarium acuminatum isolate MD1 small subunit ribosomal RNA gene, partial sequence; internal transcribed spacer 1, 5.8S ribosomal RNA gene, and internal transcribed spacer 2, complete sequence; and large subunit ribosomal RNA gene, partial sequence		not available	not available	not available
101	NSRR22_101_red2_SK	red	red2	SK	light red on top; short and dense mycelium; white and light red on back; mycelium not cover the plate	83.78	OQ923671	Fusarium avenaceum	Fusarium avenaceum strain H1 small subunit ribosomal RNA gene, partial sequence; internal transcribed spacer 1, 5.8S ribosomal RNA gene, and internal transcribed spacer 2, complete sequence; and large subunit ribosomal RNA gene, partial sequence		not available	not available	not available
102	NSRR22_102_red2_SK	red	red2	SK	light red on top; short and dense mycelium; white and light red on back; mycelium not cover the plate	99.42	OQ788314	Fusarium acuminatum	Fusarium acuminatum isolate MD1 small subunit ribosomal RNA gene, partial sequence; internal transcribed spacer 1, 5.8S ribosomal RNA gene, and internal transcribed spacer 2, complete sequence; and large subunit ribosomal RNA gene, partial sequence		not available	not available	not available
103	NSRR22_103_red2_SK	red	red2	SK	light red on top; short and dense mycelium; white and light red on back; mycelium not cover the plate	99.04	OQ788314	Fusarium acuminatum	Fusarium acuminatum isolate MD1 small subunit ribosomal RNA gene, partial sequence; internal transcribed spacer 1, 5.8S ribosomal RNA gene, and internal transcribed spacer 2, complete sequence; and large subunit ribosomal RNA gene, partial sequence		not available	not available	not available
104	NSRR22_104_red2_SK	red	red2	SK	light red on top; short and dense mycelium; white and light red on back; mycelium not cover the plate	97.39	KX869940	Fusarium acuminatum	Fusarium acuminatum isolate ARSL_311014.19 small subunit ribosomal RNA gene, partial sequence; internal transcribed spacer 1, 5.8S ribosomal RNA gene, and internal transcribed spacer 2, complete sequence; and large subunit ribosomal RNA gene, partial sequence		not available	not available	not available
105	NSRR22_105_red2_SK	red	red2	SK	light red on top; short and dense mycelium; white and light red on back; mycelium not cover the plate	99.22	KU847854	Fusarium graminearum	Fusarium graminearum isolate 110 small subunit ribosomal RNA gene, partial sequence; internal transcribed spacer 1, 5.8S ribosomal RNA gene, and internal transcribed spacer 2, complete sequence; and large subunit ribosomal RNA gene, partial sequence		not available	not available	not available
106	NSRR22_106_red2_SK	red	red2	SK	light red on top; short and dense mycelium; white and light red on back; mycelium not cover the plate	99.8	OQ658849	Fusarium graminearum	Fusarium graminearum isolate R10 internal transcribed spacer 1, partial sequence; 5.8S ribosomal RNA gene and internal transcribed spacer 2, complete sequence; and large subunit ribosomal RNA gene, partial sequence		not available	not available	not available
107	NSRR22_107_red2_SK	red	red2	SK	light red on top; short and dense mycelium; white and light red on back; mycelium not cover the plate	100	OQ788314	Fusarium acuminatum	Fusarium acuminatum isolate MD1 small subunit ribosomal RNA gene, partial sequence; internal transcribed spacer 1, 5.8S ribosomal RNA gene, and internal transcribed spacer 2, complete sequence; and large subunit ribosomal RNA gene, partial sequence		not available	not available	not available
108	NSRR22_108_red2_SK	red	red2	SK	light red on top; short and dense mycelium; white and light red on back; mycelium not cover the plate	92.78	OQ788314	Fusarium acuminatum	Fusarium acuminatum isolate MD1 small subunit ribosomal RNA gene, partial sequence; internal transcribed spacer 1, 5.8S ribosomal RNA gene, and internal transcribed spacer 2, complete sequence; and large subunit ribosomal RNA gene, partial sequence		not available	not available	not available
109	NSRR22_109_red2_SK	red	red2	SK	light red on top; short and dense mycelium; white and light red on back; mycelium not cover the plate	98.46	OQ788314	Fusarium acuminatum	Fusarium acuminatum isolate MD1 small subunit ribosomal RNA gene, partial sequence; internal transcribed spacer 1, 5.8S ribosomal RNA gene, and internal transcribed spacer 2, complete sequence; and large subunit ribosomal RNA gene, partial sequence		not available	not available	not available
110	NSRR22_110_red3_MB	red	red3	MB	red on top; short and dense mycelium; red on back, myceilium all cover the plate	98.59	ON819345	Fusarium avenaceum	Fusarium avenaceum isolate Charlie 789 small subunit ribosomal RNA gene, partial sequence; internal transcribed spacer 1, 5.8S ribosomal RNA gene, and internal transcribed spacer 2, complete sequence; and large subunit ribosomal RNA gene, partial sequence		not available	not available	not available
111	NSRR22_111_red3_MB	red	red3	MB	red on top; short and dense mycelium; red on back, myceilium all cover the plate	90.59	OQ788314	Fusarium acuminatum	Fusarium acuminatum isolate MD1 small subunit ribosomal RNA gene, partial sequence; internal transcribed spacer 1, 5.8S ribosomal RNA gene, and internal transcribed spacer 2, complete sequence; and large subunit ribosomal RNA gene, partial sequence		not available	not available	not available
112	NSRR22_112_red3_MB	red	red3	MB	red on top; short and dense mycelium; red on back, myceilium all cover the plate	98.46	MT601889	Fusarium reticulatum	Fusarium reticulatum isolate FJ9 internal transcribed spacer 1, partial sequence; 5.8S ribosomal RNA gene and internal transcribed spacer 2, complete sequence; and large subunit ribosomal RNA gene, partial sequence		not available	not available	not available
113	NSRR22_113_red3_MB	red	red3	MB	red on top; short and dense mycelium; red on back, myceilium all cover the plate	98.59	ON819345	Fusarium avenaceum	Fusarium avenaceum isolate Charlie 789 small subunit ribosomal RNA gene, partial sequence; internal transcribed spacer 1, 5.8S ribosomal RNA gene, and internal transcribed spacer 2, complete sequence; and large subunit ribosomal RNA gene, partial sequence		not available	not available	not available
114	NSRR22_114_red3_SK	red	red3	SK	red on top; short and dense mycelium; red on back, myceilium all cover the plate	96.15	MT276100	Fusarium sp.	Fusarium sp. isolate ITS1F_85 internal transcribed spacer 1, partial sequence; 5.8S ribosomal RNA gene and internal transcribed spacer 2, complete sequence; and large subunit ribosomal RNA gene, partial sequence		not available	not available	not available
115	NSRR22_115_red3_SK	red	red3	SK	red on top; short and dense mycelium; red on back, myceilium all cover the plate	100	MT276100	Fusarium sp.	Fusarium sp. isolate ITS1F_85 internal transcribed spacer 1, partial sequence; 5.8S ribosomal RNA gene and internal transcribed spacer 2, complete sequence; and large subunit ribosomal RNA gene, partial sequence		not available	not available	not available
116	NSRR22_116_red3_SK	red	red3	SK	red on top; short and dense mycelium; red on back, myceilium all cover the plate	98.26	MT276100	Fusarium sp.	Fusarium sp. isolate ITS1F_85 internal transcribed spacer 1, partial sequence; 5.8S ribosomal RNA gene and internal transcribed spacer 2, complete sequence; and large subunit ribosomal RNA gene, partial sequence		not available	not available	not available
117	NSRR22_117_red3_SK	red	red3	SK	red on top; short and dense mycelium; red on back, myceilium all cover the plate	90.14	MT276100	Fusarium sp.	Fusarium sp. isolate ITS1F_85 internal transcribed spacer 1, partial sequence; 5.8S ribosomal RNA gene and internal transcribed spacer 2, complete sequence; and large subunit ribosomal RNA gene, partial sequence		not available	not available	not available
119	NSRR22_119_red3_SK	red	red3	SK	red on top; short and dense mycelium; red on back, myceilium all cover the plate	92.18	MT276100	Fusarium sp.	Fusarium sp. isolate ITS1F_85 internal transcribed spacer 1, partial sequence; 5.8S ribosomal RNA gene and internal transcribed spacer 2, complete sequence; and large subunit ribosomal RNA gene, partial sequence		not available	not available	not available
120	NSRR22_120_red3_SK	red	red3	SK	red on top; short and dense mycelium; red on back, myceilium all cover the plate	99.61	MT276100	Fusarium sp.	Fusarium sp. isolate ITS1F_85 internal transcribed spacer 1, partial sequence; 5.8S ribosomal RNA gene and internal transcribed spacer 2, complete sequence; and large subunit ribosomal RNA gene, partial sequence		not available	not available	not available
121	NSRR22_121_red3_QC	red	red3	QC	red on top; short and dense mycelium; red on back, myceilium all cover the plate	98.41	MT276141	Fusarium avenaceum	Fusarium avenaceum isolate EW_ITS1F_133 internal transcribed spacer 1, partial sequence; 5.8S ribosomal RNA gene and internal transcribed spacer 2, complete sequence; and large subunit ribosomal RNA gene, partial sequence		not available	not available	not available
122	NSRR22_122_red4_MB	red	red4	MB	red on top; long and loose mycelium; red on back, myceilium all cover the plate	97.14	ON819345	Fusarium avenaceum	Fusarium avenaceum isolate Charlie 789 small subunit ribosomal RNA gene, partial sequence; internal transcribed spacer 1, 5.8S ribosomal RNA gene, and internal transcribed spacer 2, complete sequence; and large subunit ribosomal RNA gene, partial sequence		not available	not available	not available
123	NSRR22_123_red4_MB	red	red4	MB	red on top; long and loose mycelium; red on back, myceilium all cover the plate	97.19	MT640271	Fusarium culmorum	Fusarium culmorum isolate M62A small subunit ribosomal RNA gene, partial sequence; internal transcribed spacer 1, 5.8S ribosomal RNA gene, and internal transcribed spacer 2, complete sequence; and large subunit ribosomal RNA gene, partial sequence		not available	not available	not available
124	NSRR22_124_red4_MB	red	red4	MB	red on top; long and loose mycelium; red on back, myceilium all cover the plate	99.8	MT558728	Fusarium cerealis	Fusarium cerealis strain AT3-6 internal transcribed spacer 1, partial sequence; 5.8S ribosomal RNA gene and internal transcribed spacer 2, complete sequence; and large subunit ribosomal RNA gene, partial sequence		not available	not available	not available
125	NSRR22_125_red4_MB	red	red4	MB	red on top; long and loose mycelium; red on back, myceilium all cover the plate	93.06	MT640271	Fusarium culmorum	Fusarium culmorum isolate M62A small subunit ribosomal RNA gene, partial sequence; internal transcribed spacer 1, 5.8S ribosomal RNA gene, and internal transcribed spacer 2, complete sequence; and large subunit ribosomal RNA gene, partial sequence		not available	not available	not available
126	NSRR22_126_red4_MB	red	red4	MB	red on top; long and loose mycelium; red on back, myceilium all cover the plate	99.8	MT558728	Fusarium cerealis	Fusarium cerealis strain AT3-6 internal transcribed spacer 1, partial sequence; 5.8S ribosomal RNA gene and internal transcribed spacer 2, complete sequence; and large subunit ribosomal RNA gene, partial sequence		not available	not available	not available
127	NSRR22_127_red4_SK	red	red4	SK	red on top; long and loose mycelium; red on back, myceilium all cover the plate	99.8	MT558728	Fusarium cerealis	Fusarium cerealis strain AT3-6 internal transcribed spacer 1, partial sequence; 5.8S ribosomal RNA gene and internal transcribed spacer 2, complete sequence; and large subunit ribosomal RNA gene, partial sequence		not available	not available	not available
128	NSRR22_128_red4_SK	red	red4	SK	red on top; long and loose mycelium; red on back, myceilium all cover the plate	93.97	OQ518680	Fusarium graminearum	Fusarium graminearum strain J2 small subunit ribosomal RNA gene, partial sequence; internal transcribed spacer 1, 5.8S ribosomal RNA gene, and internal transcribed spacer 2, complete sequence; and large subunit ribosomal RNA gene, partial sequence		not available	not available	not available
129	NSRR22_129_red4_SK	red	red4	SK	red on top; long and loose mycelium; red on back, myceilium all cover the plate	99.8	MT558728	Fusarium cerealis	Fusarium cerealis strain AT3-6 internal transcribed spacer 1, partial sequence; 5.8S ribosomal RNA gene and internal transcribed spacer 2, complete sequence; and large subunit ribosomal RNA gene, partial sequence		not available	not available	not available
130	NSRR22_130_red4_SK	red	red4	SK	red on top; long and loose mycelium; red on back, myceilium all cover the plate	98.5	KT270215	Fusarium sp.	Fusarium sp. isolate P6021 internal transcribed spacer 1, partial sequence; 5.8S ribosomal RNA gene and internal transcribed spacer 2, complete sequence; and 28S ribosomal RNA gene, partial sequence		not available	not available	not available
131	NSRR22_131_red4_SK	red	red4	SK	red on top; long and loose mycelium; red on back, myceilium all cover the plate	89.08	MT276076	Fusarium culmorum	Fusarium culmorum isolate EW_ITS1F_49 internal transcribed spacer 1, partial sequence; 5.8S ribosomal RNA gene and internal transcribed spacer 2, complete sequence; and large subunit ribosomal RNA gene, partial sequence		not available	not available	not available
133	NSRR22_133_red4_SK	red	red4	SK	red on top; long and loose mycelium; red on back, myceilium all cover the plate	99.8	MT558728	Fusarium cerealis	Fusarium cerealis strain AT3-6 internal transcribed spacer 1, partial sequence; 5.8S ribosomal RNA gene and internal transcribed spacer 2, complete sequence; and large subunit ribosomal RNA gene, partial sequence		not available	not available	not available
134	NSRR22_134_red4_QC	red	red4	QC	red on top; long and loose mycelium; red on back, myceilium all cover the plate	99.8	MT635298	Fusarium sporotrichioides	Fusarium sporotrichioides internal transcribed spacer 1, partial sequence; 5.8S ribosomal RNA gene and internal transcribed spacer 2, complete sequence; and large subunit ribosomal RNA gene, partial sequence		not available	not available	not available
135	NSRR22_135_white1_MB	white	white1	MB	white on top; cotton-like mycelium; light red or white on back	100	MN452629	Fusarium oxysporum	Fusarium oxysporum isolate K_ILSO2_6_13 internal transcribed spacer 1, partial sequence; 5.8S ribosomal RNA gene and internal transcribed spacer 2, complete sequence; and large subunit ribosomal RNA gene, partial sequence		not available	not available	not available
137	NSRR22_137_white1_MB	white	white1	MB	white on top; cotton-like mycelium; light red or white on back	99.8	MN452629	Fusarium oxysporum	Fusarium oxysporum isolate K_ILSO2_6_13 internal transcribed spacer 1, partial sequence; 5.8S ribosomal RNA gene and internal transcribed spacer 2, complete sequence; and large subunit ribosomal RNA gene, partial sequence		not available	not available	not available
138	NSRR22_138_white1_MB	white	white1	MB	white on top; cotton-like mycelium; light red or white on back	99.8	MN452629	Fusarium oxysporum	Fusarium oxysporum isolate K_ILSO2_6_13 internal transcribed spacer 1, partial sequence; 5.8S ribosomal RNA gene and internal transcribed spacer 2, complete sequence; and large subunit ribosomal RNA gene, partial sequence		not available	not available	not available
139	NSRR22_139_white1_MB	white	white1	MB	white on top; cotton-like mycelium; light red or white on back	100	MN452629	Fusarium oxysporum	Fusarium oxysporum isolate K_ILSO2_6_13 internal transcribed spacer 1, partial sequence; 5.8S ribosomal RNA gene and internal transcribed spacer 2, complete sequence; and large subunit ribosomal RNA gene, partial sequence		not available	not available	not available
140	NSRR22_140_white1_MB	white	white1	MB	white on top; cotton-like mycelium; light red or white on back	97.38	MN452541	Fusarium oxysporum	Fusarium oxysporum isolate K_MISO2_6_4 internal transcribed spacer 1, partial sequence; 5.8S ribosomal RNA gene and internal transcribed spacer 2, complete sequence; and large subunit ribosomal RNA gene, partial sequence		not available	not available	not available
142	NSRR22_142_white1_MB	white	white1	MB	white on top; cotton-like mycelium; light red or white on back	99.8	MN452629	Fusarium oxysporum	Fusarium oxysporum isolate K_ILSO2_6_13 internal transcribed spacer 1, partial sequence; 5.8S ribosomal RNA gene and internal transcribed spacer 2, complete sequence; and large subunit ribosomal RNA gene, partial sequence		not available	not available	not available
143	NSRR22_143_white1_MB	white	white1	MB	white on top; cotton-like mycelium; light red or white on back	99.8	MN452629	Fusarium oxysporum	Fusarium oxysporum isolate K_ILSO2_6_13 internal transcribed spacer 1, partial sequence; 5.8S ribosomal RNA gene and internal transcribed spacer 2, complete sequence; and large subunit ribosomal RNA gene, partial sequence		not available	not available	not available
144	NSRR22_144_white1_MB	white	white1	MB	white on top; cotton-like mycelium; light red or white on back	99.8	MT635296	Fusarium equiseti	Fusarium equiseti internal transcribed spacer 1, partial sequence; 5.8S ribosomal RNA gene and internal transcribed spacer 2, complete sequence; and large subunit ribosomal RNA gene, partial sequence		not available	not available	not available
145	NSRR22_145_white1_MB	white	white1	MB	white on top; cotton-like mycelium; light red or white on back	99.03	MT453296	Fusarium oxysporum	Fusarium oxysporum isolate DSM100409_FOX small subunit ribosomal RNA gene, partial sequence; internal transcribed spacer 1, 5.8S ribosomal RNA gene, and internal transcribed spacer 2, complete sequence; and large subunit ribosomal RNA gene, partial sequence		not available	not available	not available
146	NSRR22_146_white1_MB	white	white1	MB	white on top; cotton-like mycelium; light red or white on back	98.26	LC707983	Fusarium oxysporum	Fusarium oxysporum F.TTN 02 genes for 18S rRNA, ITS1, 5.8S rRNA, ITS2, and 28S rRNA		not available	not available	not available
147	NSRR22_147_white1_SK	white	white1	SK	white on top; cotton-like mycelium; light red or white on back	99.8	MN452629	Fusarium oxysporum	Fusarium oxysporum isolate K_ILSO2_6_13 internal transcribed spacer 1, partial sequence; 5.8S ribosomal RNA gene and internal transcribed spacer 2, complete sequence; and large subunit ribosomal RNA gene, partial sequence		not available	not available	not available
148	NSRR22_148_white1_SK	white	white1	SK	white on top; cotton-like mycelium; light red or white on back	99.8	MT635296	Fusarium equiseti	Fusarium equiseti internal transcribed spacer 1, partial sequence; 5.8S ribosomal RNA gene and internal transcribed spacer 2, complete sequence; and large subunit ribosomal RNA gene, partial sequence		not available	not available	not available
149	NSRR22_149_white1_SK	white	white1	SK	white on top; cotton-like mycelium; light red or white on back	99.8	MN452629	Fusarium oxysporum	Fusarium oxysporum isolate K_ILSO2_6_13 internal transcribed spacer 1, partial sequence; 5.8S ribosomal RNA gene and internal transcribed spacer 2, complete sequence; and large subunit ribosomal RNA gene, partial sequence		not available	not available	not available
150	NSRR22_150_white1_SK	white	white1	SK	white on top; cotton-like mycelium; light red or white on back	93.54	KT455374	Fusarium oxysporum	Fusarium oxysporum strain PARC682 18S ribosomal RNA gene, partial sequence; internal transcribed spacer 1, 5.8S ribosomal RNA gene, and internal transcribed spacer 2, complete sequence; and 28S ribosomal RNA gene, partial sequence >gi|1008264989|gb|KT455375.1| Fusarium oxysporum strain PARC682b 18S ribosomal RNA gene, partial sequence; internal transcribed spacer 1, 5.8S ribosomal RNA gene, and i…		not available	not available	not available
153	NSRR22_153_white1_SK	white	white1	SK	white on top; cotton-like mycelium; light red or white on back	99.8	OQ732725	Fusarium incarnatum	Fusarium incarnatum strain ZTd-L-EPI-3B small subunit ribosomal RNA gene, partial sequence; internal transcribed spacer 1, 5.8S ribosomal RNA gene, and internal transcribed spacer 2, complete sequence; and large subunit ribosomal RNA gene, partial sequence		not available	not available	not available
154	NSRR22_154_white1_SK	white	white1	SK	white on top; cotton-like mycelium; light red or white on back	99.6	MN452629	Fusarium oxysporum	Fusarium oxysporum isolate K_ILSO2_6_13 internal transcribed spacer 1, partial sequence; 5.8S ribosomal RNA gene and internal transcribed spacer 2, complete sequence; and large subunit ribosomal RNA gene, partial sequence		not available	not available	not available
155	NSRR22_155_white1_ON	white	white1	ON	white on top; cotton-like mycelium; light red or white on back	99.6	MT635296	Fusarium equiseti	Fusarium equiseti internal transcribed spacer 1, partial sequence; 5.8S ribosomal RNA gene and internal transcribed spacer 2, complete sequence; and large subunit ribosomal RNA gene, partial sequence		not available	not available	not available
156	NSRR22_156_white1_ON	white	white1	ON	white on top; cotton-like mycelium; light red or white on back	95.22	LC707983	Fusarium oxysporum	Fusarium oxysporum F.TTN 02 genes for 18S rRNA, ITS1, 5.8S rRNA, ITS2, and 28S rRNA		not available	not available	not available
157	NSRR22_157_white1_ON	white	white1	ON	white on top; cotton-like mycelium; light red or white on back	99.03	MT530238	Fusarium oxysporum	Fusarium oxysporum clone SF_962 small subunit ribosomal RNA gene, partial sequence; internal transcribed spacer 1, 5.8S ribosomal RNA gene, and internal transcribed spacer 2, complete sequence; and large subunit ribosomal RNA gene, partial sequence		not available	not available	not available
160	NSRR22_160_white1_ON	white	white1	ON	white on top; cotton-like mycelium; light red or white on back	99.8	LC707983	Fusarium oxysporum	Fusarium oxysporum F.TTN 02 genes for 18S rRNA, ITS1, 5.8S rRNA, ITS2, and 28S rRNA		not available	not available	not available
161	NSRR22_161_white1_QC	white	white1	QC	white on top; cotton-like mycelium; light red or white on back	99.8	LC707983	Fusarium oxysporum	Fusarium oxysporum F.TTN 02 genes for 18S rRNA, ITS1, 5.8S rRNA, ITS2, and 28S rRNA		not available	not available	not available
163	NSRR22_163_white2_MB	white	white2	MB	white on top; short and loose mycelium; white orange-red on back	99.61	MT516324	Fusarium redolens	Fusarium redolens isolate Bc-2 small subunit ribosomal RNA gene, partial sequence; internal transcribed spacer 1, 5.8S ribosomal RNA gene, and internal transcribed spacer 2, complete sequence; and large subunit ribosomal RNA gene, partial sequence		not available	not available	not available
164	NSRR22_164_white2_MB	white	white2	MB	white on top; short and loose mycelium; white orange-red on back	99.81	MT516324	Fusarium redolens	Fusarium redolens isolate Bc-2 small subunit ribosomal RNA gene, partial sequence; internal transcribed spacer 1, 5.8S ribosomal RNA gene, and internal transcribed spacer 2, complete sequence; and large subunit ribosomal RNA gene, partial sequence		not available	not available	not available
165	NSRR22_165_white2_MB	white	white2	MB	white on top; short and loose mycelium; white orange-red on back	99.23	MT516324	Fusarium redolens	Fusarium redolens isolate Bc-2 small subunit ribosomal RNA gene, partial sequence; internal transcribed spacer 1, 5.8S ribosomal RNA gene, and internal transcribed spacer 2, complete sequence; and large subunit ribosomal RNA gene, partial sequence		not available	not available	not available
166	NSRR22_166_white2_MB	white	white2	MB	white on top; short and loose mycelium; white orange-red on back	98.65	MK752427	Fusarium redolens	Fusarium redolens isolate 1sidE1C6 small subunit ribosomal RNA gene, partial sequence; internal transcribed spacer 1, 5.8S ribosomal RNA gene, and internal transcribed spacer 2, complete sequence; and large subunit ribosomal RNA gene, partial sequence		not available	not available	not available
167	NSRR22_167_white2_MB	white	white2	MB	white on top; short and loose mycelium; white orange-red on back	94.2	KY318498	Fusarium sp.	Fusarium sp. isolate 37 small subunit ribosomal RNA gene, partial sequence; internal transcribed spacer 1, 5.8S ribosomal RNA gene, and internal transcribed spacer 2, complete sequence; and large subunit ribosomal RNA gene, partial sequence		not available	not available	not available
168	NSRR22_168_white2_MB	white	white2	MB	white on top; short and loose mycelium; white orange-red on back	97.49	MT516324	Fusarium redolens	Fusarium redolens isolate Bc-2 small subunit ribosomal RNA gene, partial sequence; internal transcribed spacer 1, 5.8S ribosomal RNA gene, and internal transcribed spacer 2, complete sequence; and large subunit ribosomal RNA gene, partial sequence		not available	not available	not available
169	NSRR22_169_white2_MB	white	white2	MB	white on top; short and loose mycelium; white orange-red on back	99.43	MT516324	Fusarium redolens	Fusarium redolens isolate Bc-2 small subunit ribosomal RNA gene, partial sequence; internal transcribed spacer 1, 5.8S ribosomal RNA gene, and internal transcribed spacer 2, complete sequence; and large subunit ribosomal RNA gene, partial sequence		not available	not available	not available
170	NSRR22_170_white2_MB	white	white2	MB	white on top; short and loose mycelium; white orange-red on back	99.8	LC707983	Fusarium oxysporum	Fusarium oxysporum F.TTN 02 genes for 18S rRNA, ITS1, 5.8S rRNA, ITS2, and 28S rRNA		not available	not available	not available
171	NSRR22_171_white2_MB	white	white2	MB	white on top; short and loose mycelium; white orange-red on back	99.8	LC707983	Fusarium oxysporum	Fusarium oxysporum F.TTN 02 genes for 18S rRNA, ITS1, 5.8S rRNA, ITS2, and 28S rRNA		not available	not available	not available
172	NSRR22_172_white2_MB	white	white2	MB	white on top; short and loose mycelium; white orange-red on back	99.81	MT516324	Fusarium redolens	Fusarium redolens isolate Bc-2 small subunit ribosomal RNA gene, partial sequence; internal transcribed spacer 1, 5.8S ribosomal RNA gene, and internal transcribed spacer 2, complete sequence; and large subunit ribosomal RNA gene, partial sequence		not available	not available	not available
173	NSRR22_173_white2_MB	white	white2	MB	white on top; short and loose mycelium; white orange-red on back	99.61	MT516324	Fusarium redolens	Fusarium redolens isolate Bc-2 small subunit ribosomal RNA gene, partial sequence; internal transcribed spacer 1, 5.8S ribosomal RNA gene, and internal transcribed spacer 2, complete sequence; and large subunit ribosomal RNA gene, partial sequence		not available	not available	not available
174	NSRR22_174_white2_MB	white	white2	MB	white on top; short and loose mycelium; white orange-red on back	99.81	MT560205	Fusarium redolens	Fusarium redolens strain AT03-7 small subunit ribosomal RNA gene, partial sequence; internal transcribed spacer 1, 5.8S ribosomal RNA gene, and internal transcribed spacer 2, complete sequence; and large subunit ribosomal RNA gene, partial sequence		not available	not available	not available
175	NSRR22_175_white2_MB	white	white2	MB	white on top; short and loose mycelium; white orange-red on back	99.81	MT516324	Fusarium redolens	Fusarium redolens isolate Bc-2 small subunit ribosomal RNA gene, partial sequence; internal transcribed spacer 1, 5.8S ribosomal RNA gene, and internal transcribed spacer 2, complete sequence; and large subunit ribosomal RNA gene, partial sequence		not available	not available	not available
176	NSRR22_176_white2_SK	white	white2	SK	white on top; short and loose mycelium; white orange-red on back	99.81	MT516324	Fusarium redolens	Fusarium redolens isolate Bc-2 small subunit ribosomal RNA gene, partial sequence; internal transcribed spacer 1, 5.8S ribosomal RNA gene, and internal transcribed spacer 2, complete sequence; and large subunit ribosomal RNA gene, partial sequence		not available	not available	not available
177	NSRR22_177_white2_SK	white	white2	SK	white on top; short and loose mycelium; white orange-red on back	99.81	MT516324	Fusarium redolens	Fusarium redolens isolate Bc-2 small subunit ribosomal RNA gene, partial sequence; internal transcribed spacer 1, 5.8S ribosomal RNA gene, and internal transcribed spacer 2, complete sequence; and large subunit ribosomal RNA gene, partial sequence		not available	not available	not available
179	NSRR22_179_white2_SK	white	white2	SK	white on top; short and loose mycelium; white orange-red on back	99.61	MT516324	Fusarium redolens	Fusarium redolens isolate Bc-2 small subunit ribosomal RNA gene, partial sequence; internal transcribed spacer 1, 5.8S ribosomal RNA gene, and internal transcribed spacer 2, complete sequence; and large subunit ribosomal RNA gene, partial sequence		not available	not available	not available
180	NSRR22_180_white2_SK	white	white2	SK	white on top; short and loose mycelium; white orange-red on back	99.81	MT516324	Fusarium redolens	Fusarium redolens isolate Bc-2 small subunit ribosomal RNA gene, partial sequence; internal transcribed spacer 1, 5.8S ribosomal RNA gene, and internal transcribed spacer 2, complete sequence; and large subunit ribosomal RNA gene, partial sequence		not available	not available	not available
181	NSRR22_181_white2_SK	white	white2	SK	white on top; short and loose mycelium; white orange-red on back	99.81	MT516324	Fusarium redolens	Fusarium redolens isolate Bc-2 small subunit ribosomal RNA gene, partial sequence; internal transcribed spacer 1, 5.8S ribosomal RNA gene, and internal transcribed spacer 2, complete sequence; and large subunit ribosomal RNA gene, partial sequence		not available	not available	not available
182	NSRR22_182_white2_SK	white	white2	SK	white on top; short and loose mycelium; white orange-red on back	99.81	MT516324	Fusarium redolens	Fusarium redolens isolate Bc-2 small subunit ribosomal RNA gene, partial sequence; internal transcribed spacer 1, 5.8S ribosomal RNA gene, and internal transcribed spacer 2, complete sequence; and large subunit ribosomal RNA gene, partial sequence		not available	not available	not available
183	NSRR22_183_white2_SK	white	white2	SK	white on top; short and loose mycelium; white orange-red on back	99.03	MT516324	Fusarium redolens	Fusarium redolens isolate Bc-2 small subunit ribosomal RNA gene, partial sequence; internal transcribed spacer 1, 5.8S ribosomal RNA gene, and internal transcribed spacer 2, complete sequence; and large subunit ribosomal RNA gene, partial sequence		not available	not available	not available
184	NSRR22_184_white2_SK	white	white2	SK	white on top; short and loose mycelium; white orange-red on back	99.42	MT516324	Fusarium redolens	Fusarium redolens isolate Bc-2 small subunit ribosomal RNA gene, partial sequence; internal transcribed spacer 1, 5.8S ribosomal RNA gene, and internal transcribed spacer 2, complete sequence; and large subunit ribosomal RNA gene, partial sequence		not available	not available	not available
185	NSRR22_185_white2_SK	white	white2	SK	white on top; short and loose mycelium; white orange-red on back	99.81	MT516324	Fusarium redolens	Fusarium redolens isolate Bc-2 small subunit ribosomal RNA gene, partial sequence; internal transcribed spacer 1, 5.8S ribosomal RNA gene, and internal transcribed spacer 2, complete sequence; and large subunit ribosomal RNA gene, partial sequence		not available	not available	not available
186	NSRR22_186_white2_ON	white	white2	ON	white on top; short and loose mycelium; white orange-red on back	99.81	OQ799128	Fusarium solani	Fusarium solani isolate FS4Nb internal transcribed spacer 1, partial sequence; 5.8S ribosomal RNA gene and internal transcribed spacer 2, complete sequence; and large subunit ribosomal RNA gene, partial sequence		not available	not available	not available
187	NSRR22_187_white2_ON	white	white2	ON	white on top; short and loose mycelium; white orange-red on back	99.81	OQ799128	Fusarium solani	Fusarium solani isolate FS4Nb internal transcribed spacer 1, partial sequence; 5.8S ribosomal RNA gene and internal transcribed spacer 2, complete sequence; and large subunit ribosomal RNA gene, partial sequence		not available	not available	not available
206	NSRR22_206_white4_MB	white	white4	MB	white on top; cotton-like mycelium; white brown dot on back	99.8	MT635296	Fusarium equiseti	Fusarium equiseti internal transcribed spacer 1, partial sequence; 5.8S ribosomal RNA gene and internal transcribed spacer 2, complete sequence; and large subunit ribosomal RNA gene, partial sequence		not available	not available	not available
207	NSRR22_207_white4_MB	white	white4	MB	white on top; cotton-like mycelium; white brown dot on back	99.8	MN534778	Fusarium equiseti	Fusarium equiseti isolate 13 small subunit ribosomal RNA gene, partial sequence; internal transcribed spacer 1, 5.8S ribosomal RNA gene, and internal transcribed spacer 2, complete sequence; and large subunit ribosomal RNA gene, partial sequence	100	KP674236	Fusarium equiseti	Fusarium equiseti isolate Z331 beta-tubulin (TUB2) gene, partial cds >gi|1653147854|gb|MK069604.1| Fusarium equiseti strain HGUP17361.1 beta-tubulin gene, partial cds
208	NSRR22_208_white4_MB	white	white4	MB	white on top; cotton-like mycelium; white brown dot on back	99.8	MT635296	Fusarium equiseti	Fusarium equiseti internal transcribed spacer 1, partial sequence; 5.8S ribosomal RNA gene and internal transcribed spacer 2, complete sequence; and large subunit ribosomal RNA gene, partial sequence	77.6	XM_046128938	Fusarium flagelliforme	Fusarium flagelliforme tubulin beta subunit (B0J16DRAFT_349646), mRNA
209	NSRR22_209_white4_MB	white	white4	MB	white on top; cotton-like mycelium; white brown dot on back	99.4	KY910876	Fusarium equiseti	Fusarium equiseti isolate W345 small subunit ribosomal RNA gene, partial sequence; internal transcribed spacer 1, 5.8S ribosomal RNA gene, and internal transcribed spacer 2, complete sequence; and large subunit ribosomal RNA gene, partial sequence	98.7	KT374269	Fusarium equiseti	Fusarium equiseti isolate Le2 beta-tubulin (TUB2) gene, partial cds
211	NSRR22_211_white4_MB	white	white4	MB	white on top; cotton-like mycelium; white brown dot on back	99.8	MT635296	Fusarium equiseti	Fusarium equiseti internal transcribed spacer 1, partial sequence; 5.8S ribosomal RNA gene and internal transcribed spacer 2, complete sequence; and large subunit ribosomal RNA gene, partial sequence		not available	not available	not available
212	NSRR22_212_white4_MB	white	white4	MB	white on top; cotton-like mycelium; white brown dot on back	99.6	OQ732725	Fusarium incarnatum	Fusarium incarnatum strain ZTd-L-EPI-3B small subunit ribosomal RNA gene, partial sequence; internal transcribed spacer 1, 5.8S ribosomal RNA gene, and internal transcribed spacer 2, complete sequence; and large subunit ribosomal RNA gene, partial sequence	88.61	XM_046129179	Fusarium flagelliforme	Fusarium flagelliforme tubulin beta subunit (B0J16DRAFT_351363), mRNA
213	NSRR22_213_white4_MB	white	white4	MB	white on top; cotton-like mycelium; white brown dot on back	99.6	OQ732725	Fusarium incarnatum	Fusarium incarnatum strain ZTd-L-EPI-3B small subunit ribosomal RNA gene, partial sequence; internal transcribed spacer 1, 5.8S ribosomal RNA gene, and internal transcribed spacer 2, complete sequence; and large subunit ribosomal RNA gene, partial sequence	90.51	XM_046129179	Fusarium flagelliforme	Fusarium flagelliforme tubulin beta subunit (B0J16DRAFT_351363), mRNA
214	NSRR22_214_white4_MB	white	white4	MB	white on top; cotton-like mycelium; white brown dot on back	99.39	OQ732725	Fusarium incarnatum	Fusarium incarnatum strain ZTd-L-EPI-3B small subunit ribosomal RNA gene, partial sequence; internal transcribed spacer 1, 5.8S ribosomal RNA gene, and internal transcribed spacer 2, complete sequence; and large subunit ribosomal RNA gene, partial sequence	87.85	XM_046129179	Fusarium flagelliforme	Fusarium flagelliforme tubulin beta subunit (B0J16DRAFT_351363), mRNA
216	NSRR22_216_white4_MB	white	white4	MB	white on top; cotton-like mycelium; white brown dot on back	99.61	MT276056	Fusarium equiseti	Fusarium equiseti isolate EW_ITS1F_24 internal transcribed spacer 1, partial sequence; 5.8S ribosomal RNA gene and internal transcribed spacer 2, complete sequence; and large subunit ribosomal RNA gene, partial sequence >gi|2008121176|gb|MW776277.1| Fusarium proliferatum isolate ITS1F_675 internal transcribed spacer 1, partial sequence; 5.8S ribosomal RNA gene and internal transcribed spacer 2, c…	100	OK626373	Nigrospora sp.	Nigrospora sp. strain MFG 70052 beta-tubulin (tub) gene, partial cds
217	NSRR22_217_white4_MB	white	white4	MB	white on top; cotton-like mycelium; white brown dot on back	99.8	MT635296	Fusarium equiseti	Fusarium equiseti internal transcribed spacer 1, partial sequence; 5.8S ribosomal RNA gene and internal transcribed spacer 2, complete sequence; and large subunit ribosomal RNA gene, partial sequence	93.04	XM_046129179	Fusarium flagelliforme	Fusarium flagelliforme tubulin beta subunit (B0J16DRAFT_351363), mRNA
218	NSRR22_218_white4_MB	white	white4	MB	white on top; cotton-like mycelium; white brown dot on back	94.83	MN534778	Fusarium equiseti	Fusarium equiseti isolate 13 small subunit ribosomal RNA gene, partial sequence; internal transcribed spacer 1, 5.8S ribosomal RNA gene, and internal transcribed spacer 2, complete sequence; and large subunit ribosomal RNA gene, partial sequence	97.87	MW533850	Fusarium compactum	Fusarium compactum strain LC13700 beta-tubulin gene, partial cds >gi|2200966392|gb|MW533877.1| Fusarium ipomoeae strain LC12164 beta-tubulin gene, partial cds >gi|2200966398|gb|MW533880.1| Fusarium ipomoeae strain LC13709 beta-tubulin gene, partial cds >gi|2200966400|gb|MW533881.1| Fusarium ipomoeae strain LC13710 beta-tubulin gene, partial cds
219	NSRR22_219_white4_MB	white	white4	MB	white on top; cotton-like mycelium; white brown dot on back	97.82	MT635296	Fusarium equiseti	Fusarium equiseti internal transcribed spacer 1, partial sequence; 5.8S ribosomal RNA gene and internal transcribed spacer 2, complete sequence; and large subunit ribosomal RNA gene, partial sequence	100	XM_046129179	Fusarium flagelliforme	Fusarium flagelliforme tubulin beta subunit (B0J16DRAFT_351363), mRNA
220	NSRR22_220_white4_MB	white	white4	MB	white on top; cotton-like mycelium; white brown dot on back	99.8	MT635296	Fusarium equiseti	Fusarium equiseti internal transcribed spacer 1, partial sequence; 5.8S ribosomal RNA gene and internal transcribed spacer 2, complete sequence; and large subunit ribosomal RNA gene, partial sequence		not available	not available	not available
222	NSRR22_222_white4_ON	white	white4	ON	white on top; cotton-like mycelium; white brown dot on back	98.85	MT032394	Fusarium longipes	Fusarium longipes isolate PKS13 small subunit ribosomal RNA gene, partial sequence; internal transcribed spacer 1, 5.8S ribosomal RNA gene, and internal transcribed spacer 2, complete sequence; and large subunit ribosomal RNA gene, partial sequence	100	KU938967	Fusarium equiseti	Fusarium equiseti strain LNHD2 beta-tubulin gene, partial cds
223	NSRR22_223_white4_SK	white	white4	SK	white on top; cotton-like mycelium; white brown dot on back	99.8	MH862468	Fusarium equiseti	Fusarium equiseti culture CBS:307.94 strain CBS 307.94 small subunit ribosomal RNA gene, partial sequence; internal transcribed spacer 1, 5.8S ribosomal RNA gene, and internal transcribed spacer 2, complete sequence; and large subunit ribosomal RNA gene, partial sequence	96.63	KP674236	Fusarium equiseti	Fusarium equiseti isolate Z331 beta-tubulin (TUB2) gene, partial cds >gi|1653147854|gb|MK069604.1| Fusarium equiseti strain HGUP17361.1 beta-tubulin gene, partial cds
224	NSRR22_224_white4_SK	white	white4	SK	white on top; cotton-like mycelium; white brown dot on back	99.8	OQ732725	Fusarium incarnatum	Fusarium incarnatum strain ZTd-L-EPI-3B small subunit ribosomal RNA gene, partial sequence; internal transcribed spacer 1, 5.8S ribosomal RNA gene, and internal transcribed spacer 2, complete sequence; and large subunit ribosomal RNA gene, partial sequence		not available	not available	not available
226	NSRR22_226_white4_SK	white	white4	SK	white on top; cotton-like mycelium; white brown dot on back	98.41	OQ732725	Fusarium incarnatum	Fusarium incarnatum strain ZTd-L-EPI-3B small subunit ribosomal RNA gene, partial sequence; internal transcribed spacer 1, 5.8S ribosomal RNA gene, and internal transcribed spacer 2, complete sequence; and large subunit ribosomal RNA gene, partial sequence	85.45	XM_046129179	Fusarium flagelliforme	Fusarium flagelliforme tubulin beta subunit (B0J16DRAFT_351363), mRNA
227	NSRR22_227_white4_SK	white	white4	SK	white on top; cotton-like mycelium; white brown dot on back	99.8	MT635296	Fusarium equiseti	Fusarium equiseti internal transcribed spacer 1, partial sequence; 5.8S ribosomal RNA gene and internal transcribed spacer 2, complete sequence; and large subunit ribosomal RNA gene, partial sequence		not available	not available	not available
228	NSRR22_228_white4_SK	white	white4	SK	white on top; cotton-like mycelium; white brown dot on back	99.21	MT635296	Fusarium equiseti	Fusarium equiseti internal transcribed spacer 1, partial sequence; 5.8S ribosomal RNA gene and internal transcribed spacer 2, complete sequence; and large subunit ribosomal RNA gene, partial sequence		not available	not available	not available
229	NSRR22_229_white4_SK	white	white4	SK	white on top; cotton-like mycelium; white brown dot on back	91.73	MN396528	Fusarium equiseti	Fusarium equiseti strain FMB 0193 small subunit ribosomal RNA gene, partial sequence; internal transcribed spacer 1, 5.8S ribosomal RNA gene, and internal transcribed spacer 2, complete sequence; and large subunit ribosomal RNA gene, partial sequence	88.16	KP674236	Fusarium equiseti	Fusarium equiseti isolate Z331 beta-tubulin (TUB2) gene, partial cds >gi|1653147854|gb|MK069604.1| Fusarium equiseti strain HGUP17361.1 beta-tubulin gene, partial cds
230	NSRR22_230_white4_SK	white	white4	SK	white on top; cotton-like mycelium; white brown dot on back	96.67	OQ918017	Fusarium incarnatum	Fusarium incarnatum strain PJ19 small subunit ribosomal RNA gene, partial sequence; internal transcribed spacer 1, 5.8S ribosomal RNA gene, and internal transcribed spacer 2, complete sequence; and large subunit ribosomal RNA gene, partial sequence	96.77	KX880337	Fusarium equiseti	Fusarium equiseti strain G14WX2-8 beta-tubulin (tub2) gene, partial cds
231	NSRR22_231_white4_SK	white	white4	SK	white on top; cotton-like mycelium; white brown dot on back	99.8	OQ732725	Fusarium incarnatum	Fusarium incarnatum strain ZTd-L-EPI-3B small subunit ribosomal RNA gene, partial sequence; internal transcribed spacer 1, 5.8S ribosomal RNA gene, and internal transcribed spacer 2, complete sequence; and large subunit ribosomal RNA gene, partial sequence	88.68	LN901621	Fusarium sp.	Fusarium sp. FIESC_5 partial tubb gene for beta tubulin, strain ITEM 10789
232	NSRR22_232_purple1_MB	purple	purple1	MB	purple color on top; cotton-like loose mycelium; purple and/or pink color on back	98.81	MN452518	Fusarium oxysporum	Fusarium oxysporum isolate IASO1_5_3A internal transcribed spacer 1, partial sequence; 5.8S ribosomal RNA gene and internal transcribed spacer 2, complete sequence; and large subunit ribosomal RNA gene, partial sequence		not available	not available	not available
233	NSRR22_233_purple1_MB	purple	purple1	MB	purple color on top; cotton-like loose mycelium; purple and/or pink color on back	99.8	LC707983	Fusarium oxysporum	Fusarium oxysporum F.TTN 02 genes for 18S rRNA, ITS1, 5.8S rRNA, ITS2, and 28S rRNA		not available	not available	not available
234	NSRR22_234_purple1_MB	purple	purple1	MB	purple color on top; cotton-like loose mycelium; purple and/or pink color on back	100	LC707983	Fusarium oxysporum	Fusarium oxysporum F.TTN 02 genes for 18S rRNA, ITS1, 5.8S rRNA, ITS2, and 28S rRNA		not available	not available	not available
235	NSRR22_235_purple1_MB	purple	purple1	MB	purple color on top; cotton-like loose mycelium; purple and/or pink color on back	99.8	LC707983	Fusarium oxysporum	Fusarium oxysporum F.TTN 02 genes for 18S rRNA, ITS1, 5.8S rRNA, ITS2, and 28S rRNA		not available	not available	not available
236	NSRR22_236_purple1_MB	purple	purple1	MB	purple color on top; cotton-like loose mycelium; purple and/or pink color on back	99.6	LC707983	Fusarium oxysporum	Fusarium oxysporum F.TTN 02 genes for 18S rRNA, ITS1, 5.8S rRNA, ITS2, and 28S rRNA		not available	not available	not available
237	NSRR22_237_purple1_MB	purple	purple1	MB	purple color on top; cotton-like loose mycelium; purple and/or pink color on back	99.4	LC707983	Fusarium oxysporum	Fusarium oxysporum F.TTN 02 genes for 18S rRNA, ITS1, 5.8S rRNA, ITS2, and 28S rRNA		not available	not available	not available
238	NSRR22_238_purple1_MB	purple	purple1	MB	purple color on top; cotton-like loose mycelium; purple and/or pink color on back	99.6	LC707983	Fusarium oxysporum	Fusarium oxysporum F.TTN 02 genes for 18S rRNA, ITS1, 5.8S rRNA, ITS2, and 28S rRNA		not available	not available	not available
239	NSRR22_239_purple1_MB	purple	purple1	MB	purple color on top; cotton-like loose mycelium; purple and/or pink color on back	98.8	LC707983	Fusarium oxysporum	Fusarium oxysporum F.TTN 02 genes for 18S rRNA, ITS1, 5.8S rRNA, ITS2, and 28S rRNA		not available	not available	not available
240	NSRR22_240_purple1_MB	purple	purple1	MB	purple color on top; cotton-like loose mycelium; purple and/or pink color on back	96.12	MT530238	Fusarium oxysporum	Fusarium oxysporum clone SF_962 small subunit ribosomal RNA gene, partial sequence; internal transcribed spacer 1, 5.8S ribosomal RNA gene, and internal transcribed spacer 2, complete sequence; and large subunit ribosomal RNA gene, partial sequence		not available	not available	not available
241	NSRR22_241_purple1_MB	purple	purple1	MB	purple color on top; cotton-like loose mycelium; purple and/or pink color on back	99.8	LC707983	Fusarium oxysporum	Fusarium oxysporum F.TTN 02 genes for 18S rRNA, ITS1, 5.8S rRNA, ITS2, and 28S rRNA		not available	not available	not available
242	NSRR22_242_purple1_MB	purple	purple1	MB	purple color on top; cotton-like loose mycelium; purple and/or pink color on back	99.6	LC707983	Fusarium oxysporum	Fusarium oxysporum F.TTN 02 genes for 18S rRNA, ITS1, 5.8S rRNA, ITS2, and 28S rRNA		not available	not available	not available
243	NSRR22_243_purple1_MB	purple	purple1	MB	purple color on top; cotton-like loose mycelium; purple and/or pink color on back	86.33	OQ925905	Fusarium verticillioides	Fusarium verticillioides strain FV12MCULSIN internal transcribed spacer 1, partial sequence; 5.8S ribosomal RNA gene and internal transcribed spacer 2, complete sequence; and large subunit ribosomal RNA gene, partial sequence		not available	not available	not available
244	NSRR22_244_purple1_MB	purple	purple1	MB	purple color on top; cotton-like loose mycelium; purple and/or pink color on back	92.9	OQ925905	Fusarium verticillioides	Fusarium verticillioides strain FV12MCULSIN internal transcribed spacer 1, partial sequence; 5.8S ribosomal RNA gene and internal transcribed spacer 2, complete sequence; and large subunit ribosomal RNA gene, partial sequence		not available	not available	not available
245	NSRR22_245_purple1_MB	purple	purple1	MB	purple color on top; cotton-like loose mycelium; purple and/or pink color on back	98.61	LC707983	Fusarium oxysporum	Fusarium oxysporum F.TTN 02 genes for 18S rRNA, ITS1, 5.8S rRNA, ITS2, and 28S rRNA		not available	not available	not available
246	NSRR22_246_purple1_ON	purple	purple1	ON	purple color on top; cotton-like loose mycelium; purple and/or pink color on back	98.81	OQ891114	Fusarium oxysporum	Fusarium oxysporum isolate F31 small subunit ribosomal RNA gene, partial sequence; internal transcribed spacer 1, 5.8S ribosomal RNA gene, and internal transcribed spacer 2, complete sequence; and large subunit ribosomal RNA gene, partial sequence		not available	not available	not available
249	NSRR22_249_purple1_ON	purple	purple1	ON	purple color on top; cotton-like loose mycelium; purple and/or pink color on back	92.7	LC707983	Fusarium oxysporum	Fusarium oxysporum F.TTN 02 genes for 18S rRNA, ITS1, 5.8S rRNA, ITS2, and 28S rRNA		not available	not available	not available
250	NSRR22_250_purple1_ON	purple	purple1	ON	purple color on top; cotton-like loose mycelium; purple and/or pink color on back	93.45	OQ891114	Fusarium oxysporum	Fusarium oxysporum isolate F31 small subunit ribosomal RNA gene, partial sequence; internal transcribed spacer 1, 5.8S ribosomal RNA gene, and internal transcribed spacer 2, complete sequence; and large subunit ribosomal RNA gene, partial sequence		not available	not available	not available
251	NSRR22_251_purple1_ON	purple	purple1	ON	purple color on top; cotton-like loose mycelium; purple and/or pink color on back	93.57	OQ925905	Fusarium verticillioides	Fusarium verticillioides strain FV12MCULSIN internal transcribed spacer 1, partial sequence; 5.8S ribosomal RNA gene and internal transcribed spacer 2, complete sequence; and large subunit ribosomal RNA gene, partial sequence		not available	not available	not available
252	NSRR22_252_purple1_ON	purple	purple1	ON	purple color on top; cotton-like loose mycelium; purple and/or pink color on back	88.24	MK696910	Fusarium oxysporum	Fusarium oxysporum isolate C563-B3 internal transcribed spacer 1, partial sequence; 5.8S ribosomal RNA gene, complete sequence; and internal transcribed spacer 2, partial sequence		not available	not available	not available
257	NSRR22_257_purple1_QC	purple	purple1	QC	purple color on top; cotton-like loose mycelium; purple and/or pink color on back	99.8	LC707983	Fusarium oxysporum	Fusarium oxysporum F.TTN 02 genes for 18S rRNA, ITS1, 5.8S rRNA, ITS2, and 28S rRNA		not available	not available	not available
258	NSRR22_258_purple1_QC	purple	purple1	QC	purple color on top; cotton-like loose mycelium; purple and/or pink color on back	89.78	MN521952	Fusarium oxysporum	Fusarium oxysporum clone 2014_159 internal transcribed spacer 1, partial sequence; 5.8S ribosomal RNA gene and internal transcribed spacer 2, complete sequence; and large subunit ribosomal RNA gene, partial sequence		not available	not available	not available
308	NSRR22_308_slimy1_MB	other	slimy1	MB	white on top; slimy and greasy mycelium; no color on the back	92.88	MN451887	Fusarium oxysporum	Fusarium oxysporum isolate K_IASO2_6_12 internal transcribed spacer 1, partial sequence; 5.8S ribosomal RNA gene, complete sequence; and internal transcribed spacer 2, partial sequence >gi|1740139675|gb|MN451888.1| Fusarium equiseti isolate K_IASO2_6_4 internal transcribed spacer 1, partial sequence; 5.8S ribosomal RNA gene, complete sequence; and internal transcribed spacer 2, partial sequence		not available	not available	not available
309	NSRR22_309_slimy1_MB	other	slimy1	MB	white on top; slimy and greasy mycelium; no color on the back	100	MT032645	Fusarium oxysporum	Fusarium oxysporum isolate G167_ITS_A12_048.ab1 internal transcribed spacer 1, partial sequence; 5.8S ribosomal RNA gene and internal transcribed spacer 2, complete sequence; and large subunit ribosomal RNA gene, partial sequence >gi|1807079691|gb|MT032649.1| Fusarium oxysporum isolate G323_ITS_C12_046.ab1 internal transcribed spacer 1, partial sequence; 5.8S ribosomal RNA gene and internal trans…		not available	not available	not available
310	NSRR22_310_slimy1_ON	other	slimy1	ON	white on top; slimy and greasy mycelium; no color on the back	99.8	MT032645	Fusarium oxysporum	Fusarium oxysporum isolate G167_ITS_A12_048.ab1 internal transcribed spacer 1, partial sequence; 5.8S ribosomal RNA gene and internal transcribed spacer 2, complete sequence; and large subunit ribosomal RNA gene, partial sequence >gi|1807079691|gb|MT032649.1| Fusarium oxysporum isolate G323_ITS_C12_046.ab1 internal transcribed spacer 1, partial sequence; 5.8S ribosomal RNA gene and internal trans…		not available	not available	not available
313	NSRR22_313_slimy1_SK	other	slimy1	SK	white on top; slimy and greasy mycelium; no color on the back	97	MT032645	Fusarium oxysporum	Fusarium oxysporum isolate G167_ITS_A12_048.ab1 internal transcribed spacer 1, partial sequence; 5.8S ribosomal RNA gene and internal transcribed spacer 2, complete sequence; and large subunit ribosomal RNA gene, partial sequence >gi|1807079691|gb|MT032649.1| Fusarium oxysporum isolate G323_ITS_C12_046.ab1 internal transcribed spacer 1, partial sequence; 5.8S ribosomal RNA gene and internal trans…		not available	not available	not available
314	NSRR22_314_slimy1_SK	other	slimy1	SK	white on top; slimy and greasy mycelium; no color on the back	99.81	MT032645	Fusarium oxysporum	Fusarium oxysporum isolate G167_ITS_A12_048.ab1 internal transcribed spacer 1, partial sequence; 5.8S ribosomal RNA gene and internal transcribed spacer 2, complete sequence; and large subunit ribosomal RNA gene, partial sequence >gi|1807079691|gb|MT032649.1| Fusarium oxysporum isolate G323_ITS_C12_046.ab1 internal transcribed spacer 1, partial sequence; 5.8S ribosomal RNA gene and internal trans…		not available	not available	not available
319	NSRR22_319_green1_ON	other	green1	ON		98.31	MT605584	Fusarium solani	Fusarium solani isolate SY1 small subunit ribosomal RNA gene, partial sequence; internal transcribed spacer 1, 5.8S ribosomal RNA gene, and internal transcribed spacer 2, complete sequence; and large subunit ribosomal RNA gene, partial sequence	100	MK069602	Fusarium solani	Fusarium solani strain HGUP1833.1 beta-tubulin gene, partial cds
324	NSRR22_324_yellow1_QC	other	yellow1	QC		99.8	MT635298	Fusarium sporotrichioides	Fusarium sporotrichioides internal transcribed spacer 1, partial sequence; 5.8S ribosomal RNA gene and internal transcribed spacer 2, complete sequence; and large subunit ribosomal RNA gene, partial sequence	100	GQ857023	Fusarium sporotrichioides	Fusarium sporotrichioides isolate CaesZmN205 beta-tubulin gene, partial cds
328	NSRR22_328_other_MB	other	other	MB		90.15	OQ533546	Fusarium tricinctum	Fusarium tricinctum isolate BBJ-2-3 small subunit ribosomal RNA gene, partial sequence; internal transcribed spacer 1, 5.8S ribosomal RNA gene, and internal transcribed spacer 2, complete sequence; and large subunit ribosomal RNA gene, partial sequence	84.62	FJ154742	Fusarium acuminatum	Fusarium acuminatum isolate R-6934 beta tubulin (benA) gene, partial sequence
331	NSRR22_331_other_ON	other	other	ON		99.25	MT251175	Fusarium falciforme	Fusarium falciforme strain DTO 422-H8 small subunit ribosomal RNA gene, partial sequence; internal transcribed spacer 1, 5.8S ribosomal RNA gene, and internal transcribed spacer 2, complete sequence; and large subunit ribosomal RNA gene, partial sequence	89.67	KY923278	Fusarium solani	Fusarium solani strain CSAEGro-DAAF2 beta-tubulin (TUB2) gene, partial cds
338	NSRR_ref_MB_F. graminearum					88.6	KT223328.1	Fusarium graminearum	Fusarium graminearum strain D-1-2 internal transcribed spacer 1, partial sequence; 5.8S ribosomal RNA gene and internal transcribed spacer 2, complete sequence; and 28S ribosomal RNA gene, partial sequence	100	MF687263	Fusarium graminearum	Fusarium graminearum strain S761 beta-tubulin (TUB) gene, partial cds
340	NSRR_ref_MB_F. solani					99.71	OQ891086.1	Fusarium solani	Fusarium solani isolate raf-era13 small subunit ribosomal RNA gene, partial sequence; internal transcribed spacer 1, 5.8S ribosomal RNA gene, and internal transcribed spacer 2, complete sequence; and large subunit ribosomal RNA gene, partial sequence		not available	not available	not available
342	NSRR_ref_MB_F. avenaceum					98.15	MT276141	Fusarium avenaceum	Fusarium avenaceum isolate EW_ITS1F_133 internal transcribed spacer 1, partial sequence; 5.8S ribosomal RNA gene and internal transcribed spacer 2, complete sequence; and large subunit ribosomal RNA gene, partial sequence	99.8	KU852661	Fusarium avenaceum	Fusarium avenaceum isolate K12 15 S beta-tubulin (TUB2) gene, partial cds
343	NSRR_ref_MB_F. acuminatum					99.23	OQ788314	Fusarium acuminatum	Fusarium acuminatum isolate MD1 small subunit ribosomal RNA gene, partial sequence; internal transcribed spacer 1, 5.8S ribosomal RNA gene, and internal transcribed spacer 2, complete sequence; and large subunit ribosomal RNA gene, partial sequence	100	MH341248	Fusarium acuminatum	Fusarium acuminatum strain gss163 beta-tubulin (tub2) gene, partial cds
346	NSRR_ref_MB_F. oxysporum					98.8	OQ891114	Fusarium oxysporum	Fusarium oxysporum isolate F31 small subunit ribosomal RNA gene, partial sequence; internal transcribed spacer 1, 5.8S ribosomal RNA gene, and internal transcribed spacer 2, complete sequence; and large subunit ribosomal RNA gene, partial sequence		not available	not available	not available
348	NSRR_ref_MB_F. redolens					93.32	MT560205.1	Fusarium redolen	Fusarium redolens strain AT03-7 small subunit ribosomal RNA gene, partial sequence; internal transcribed spacer 1, 5.8S ribosomal RNA gene, and internal transcribed spacer 2, complete sequence; and large subunit ribosomal RNA gene, partial sequence		not available	not available	not available
